# Supplementary material for: The Revelation of Continuously Organized, Co-Overexpressed Protein-Coding Genes with Roles in Cellular Communications in Breast Cancer
Source: MDPI journal article supplement (doi:10.3390/cells11233806), 2022-11-28
Supplement: s1 [file s1]

# **The Revelation of Continuously Organized, Co Overexpressed Protein-Coding Genes with Roles in Cellular Communications in Breast Cancer**

**Aswathy Mary Paul, Revikumar Amjesh, Bijesh George, Deivendran Sankaran, Oleta A. Sandiford, Pranela Rameshwar, Madhavan Radhakrishna Pillai and Rakesh Kumar**

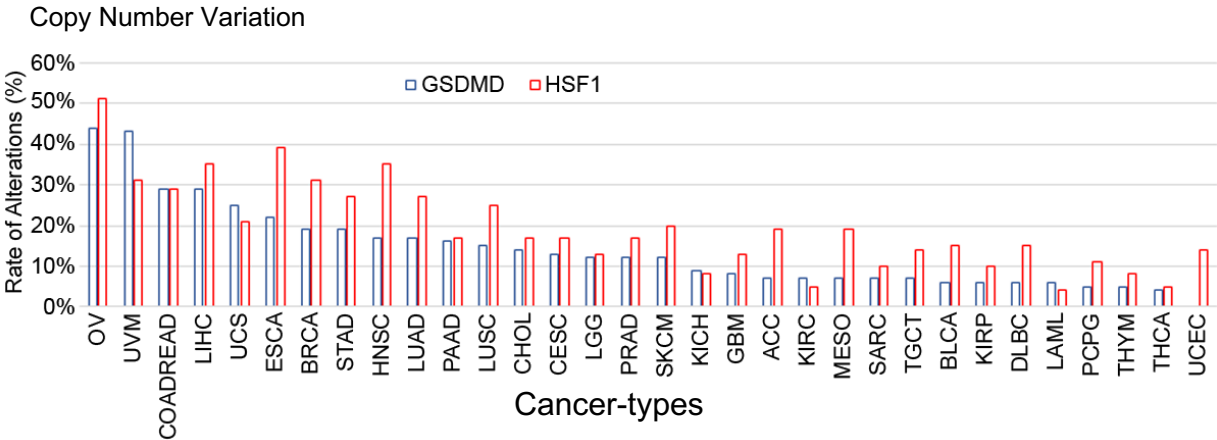

**Supplementary Figure S1:** Similar pattern of alterations of GSDMD and HSF1. Percentage of the CNV alterations of GSDMD and HSF1 across the human cancer. The X-axis represents cancer types described as per the TCGA abbreviation, and Y-axis represents the rate of alterations. Data shown here is based on GSDMD alteration rate in the cBioportal database.

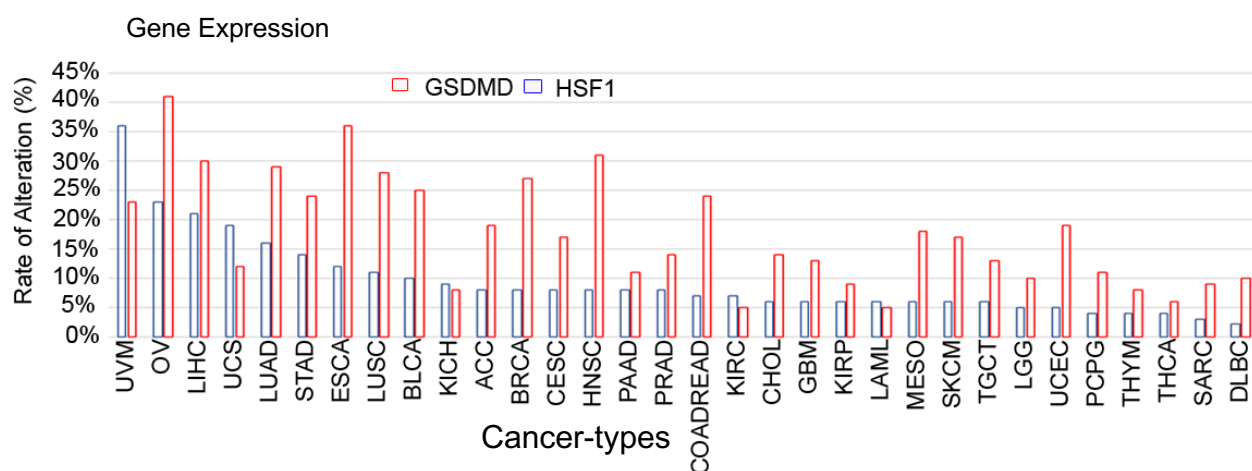

**Supplementary Figure S2:** Overexpression of GSDMD and HSF1 in human cancer. Percentage of alterations of GSDMD and HSF1 across different cancer at the mRNA level. The X-axis represents cancer types described as per the TCGA abbreviation, and Y-axis represents the rate of alterations. Data shown here is based on GSDMD alteration rate in the cBioportal database.

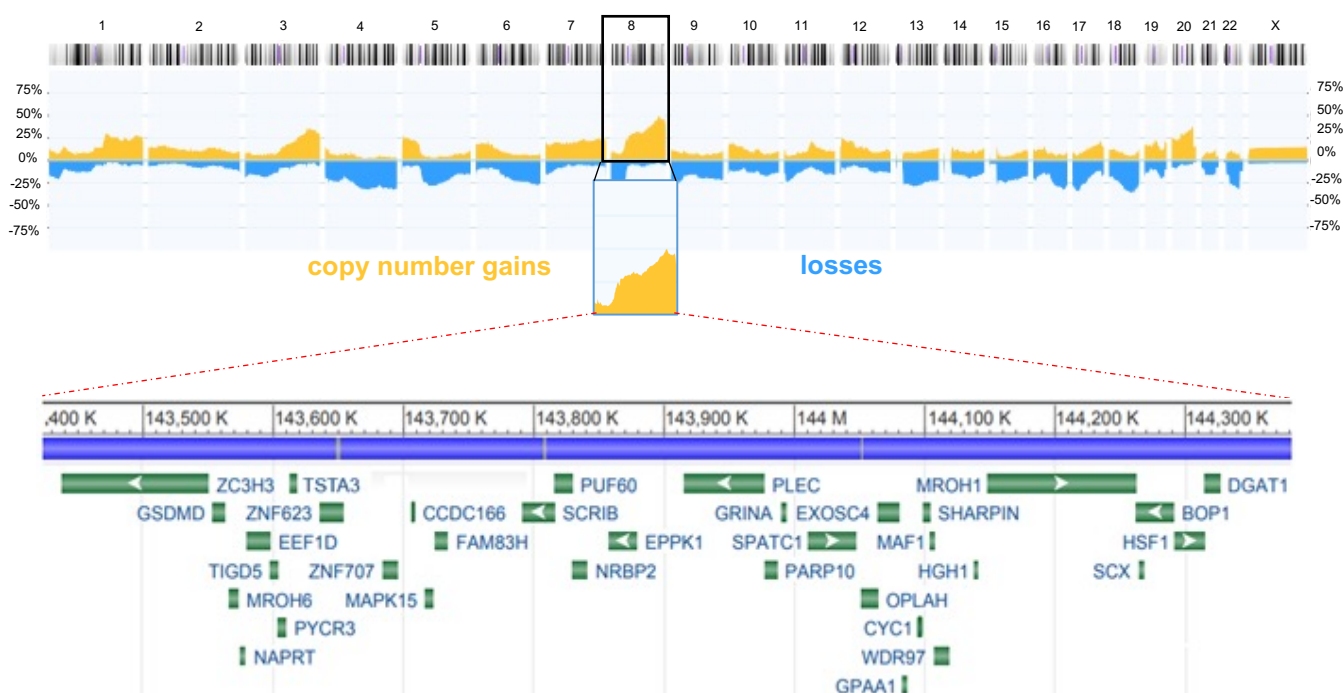

**Supplementary Figure S3:** Chromosomal status and genomic region. Progenetix analysis (44) of the amplified chromosome 8 in breast cancer. CanCord34 genes reside on 8p24, 143437655 – 144326919 region.

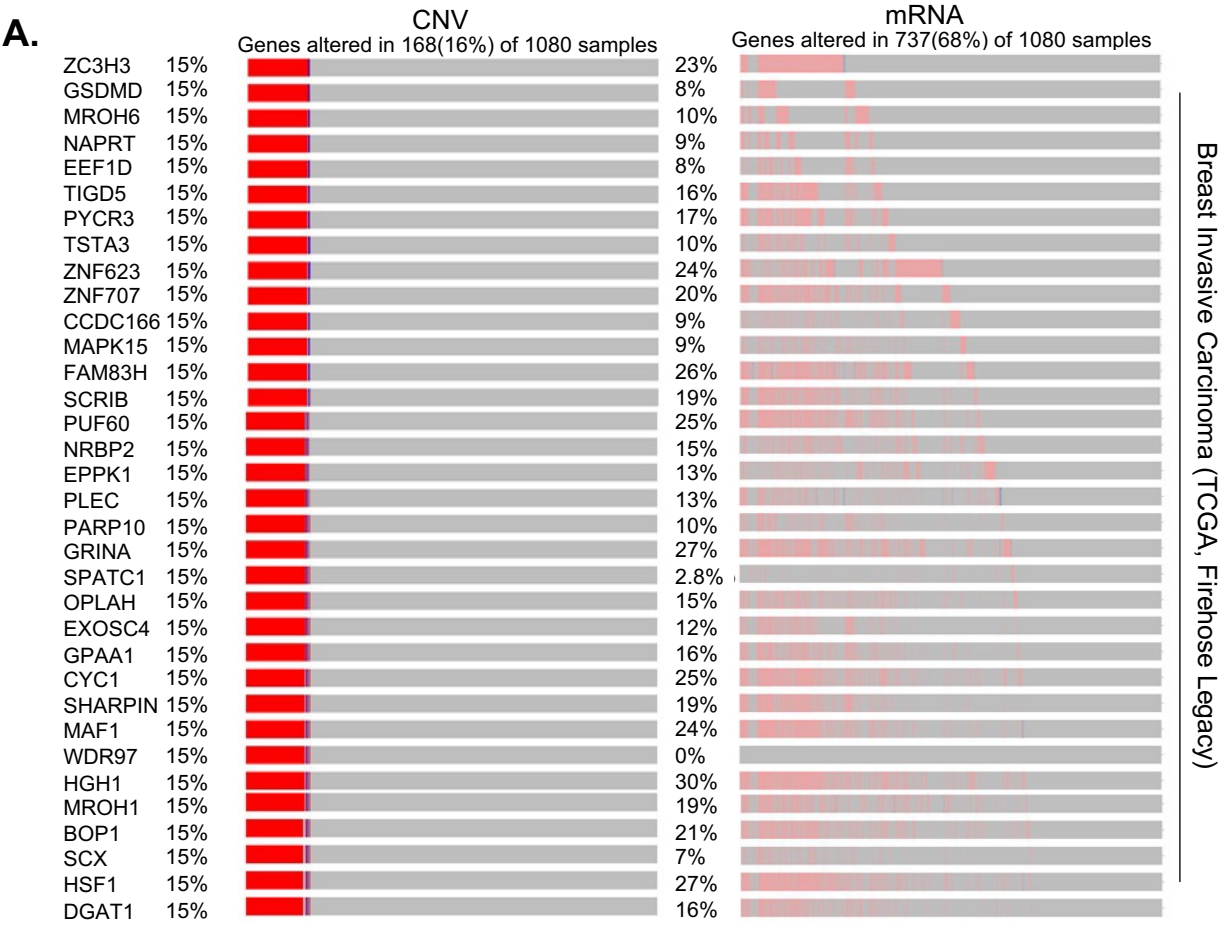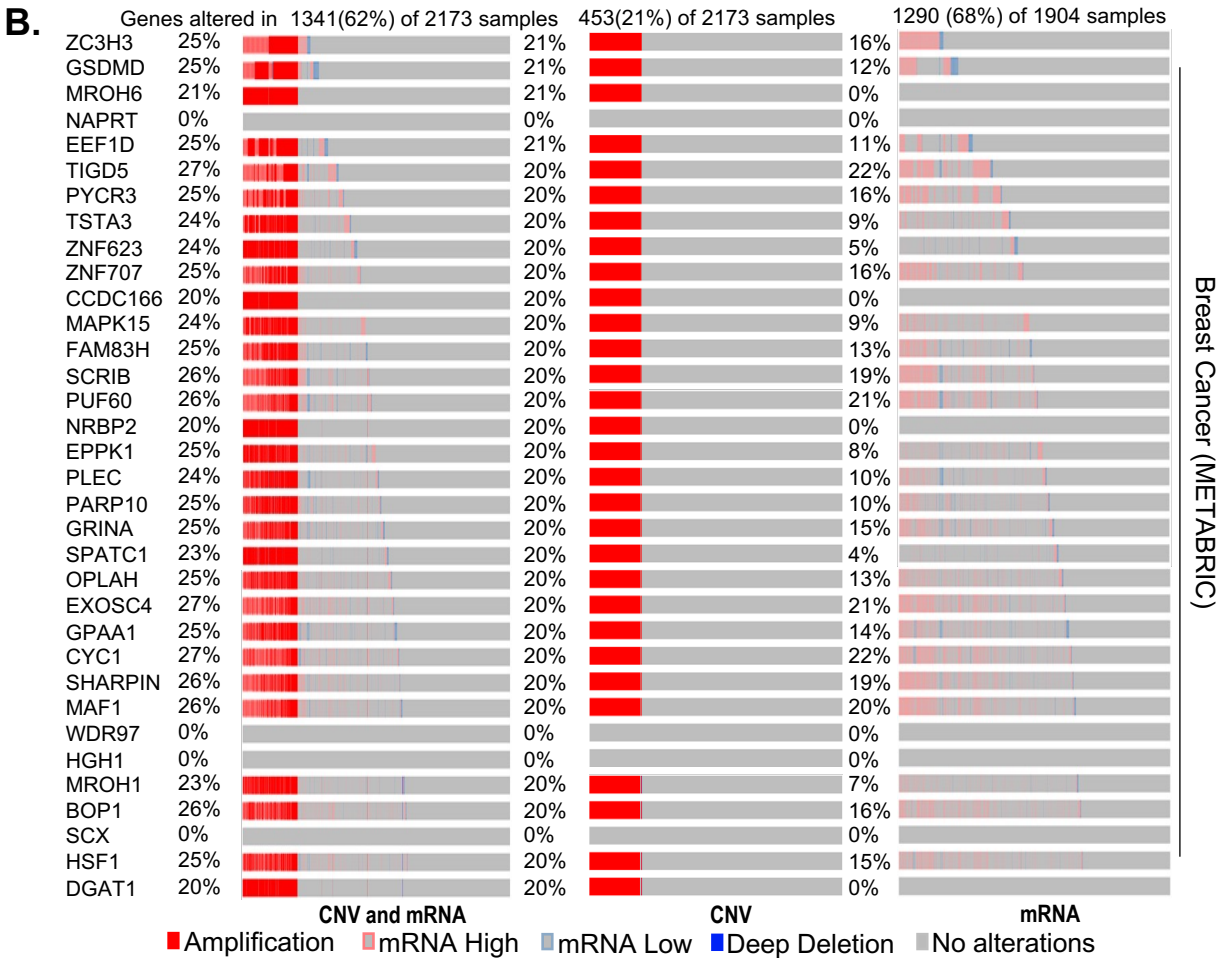

Supplementary Figure S4

**C.**

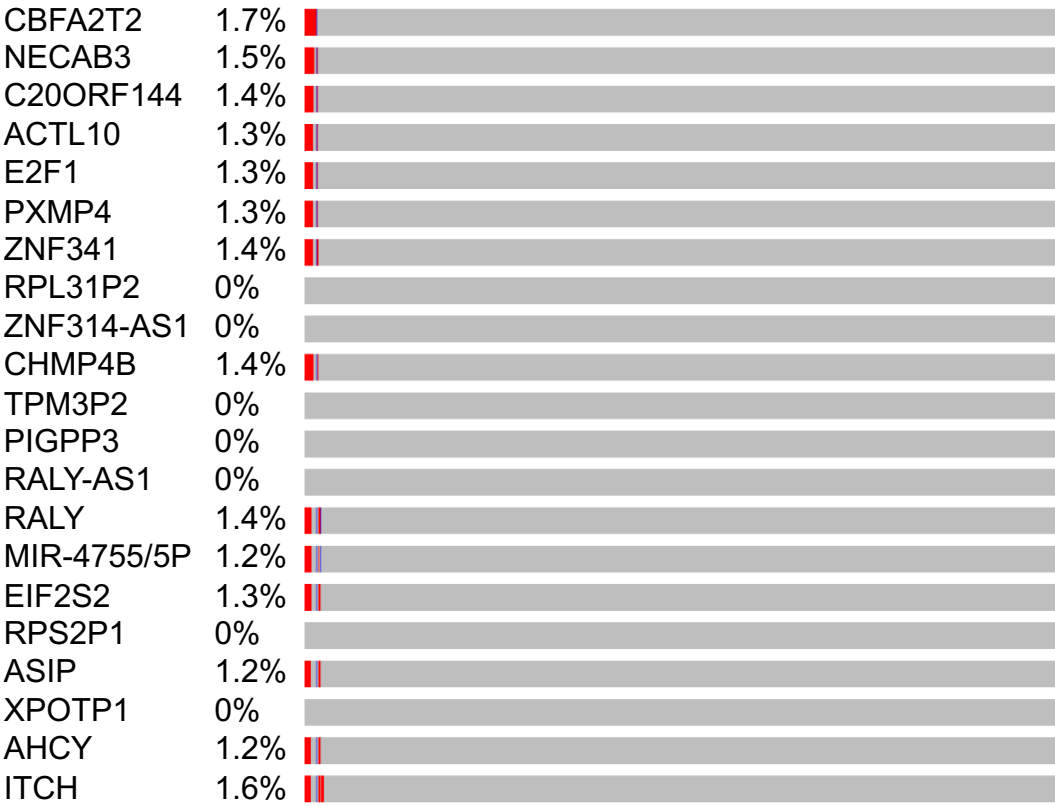

**Supplementary Figure S4:** Widespread upregulation of CanCord34 genes in breast cancer. **(A)** Breast Cancer data from cBioPortal divided into CNVs and mRNAs; **(B)** CanCord34 expression in Metabric breast cancer datasets. mRNA and CNV together, CNV alone and mRNA alone; and **(C)** Represents the amplification of a random chromosome region chr20:33490075-34540748, showing limited or albeit or no upregulation of a limited number of continuously organized protein-coding genes.

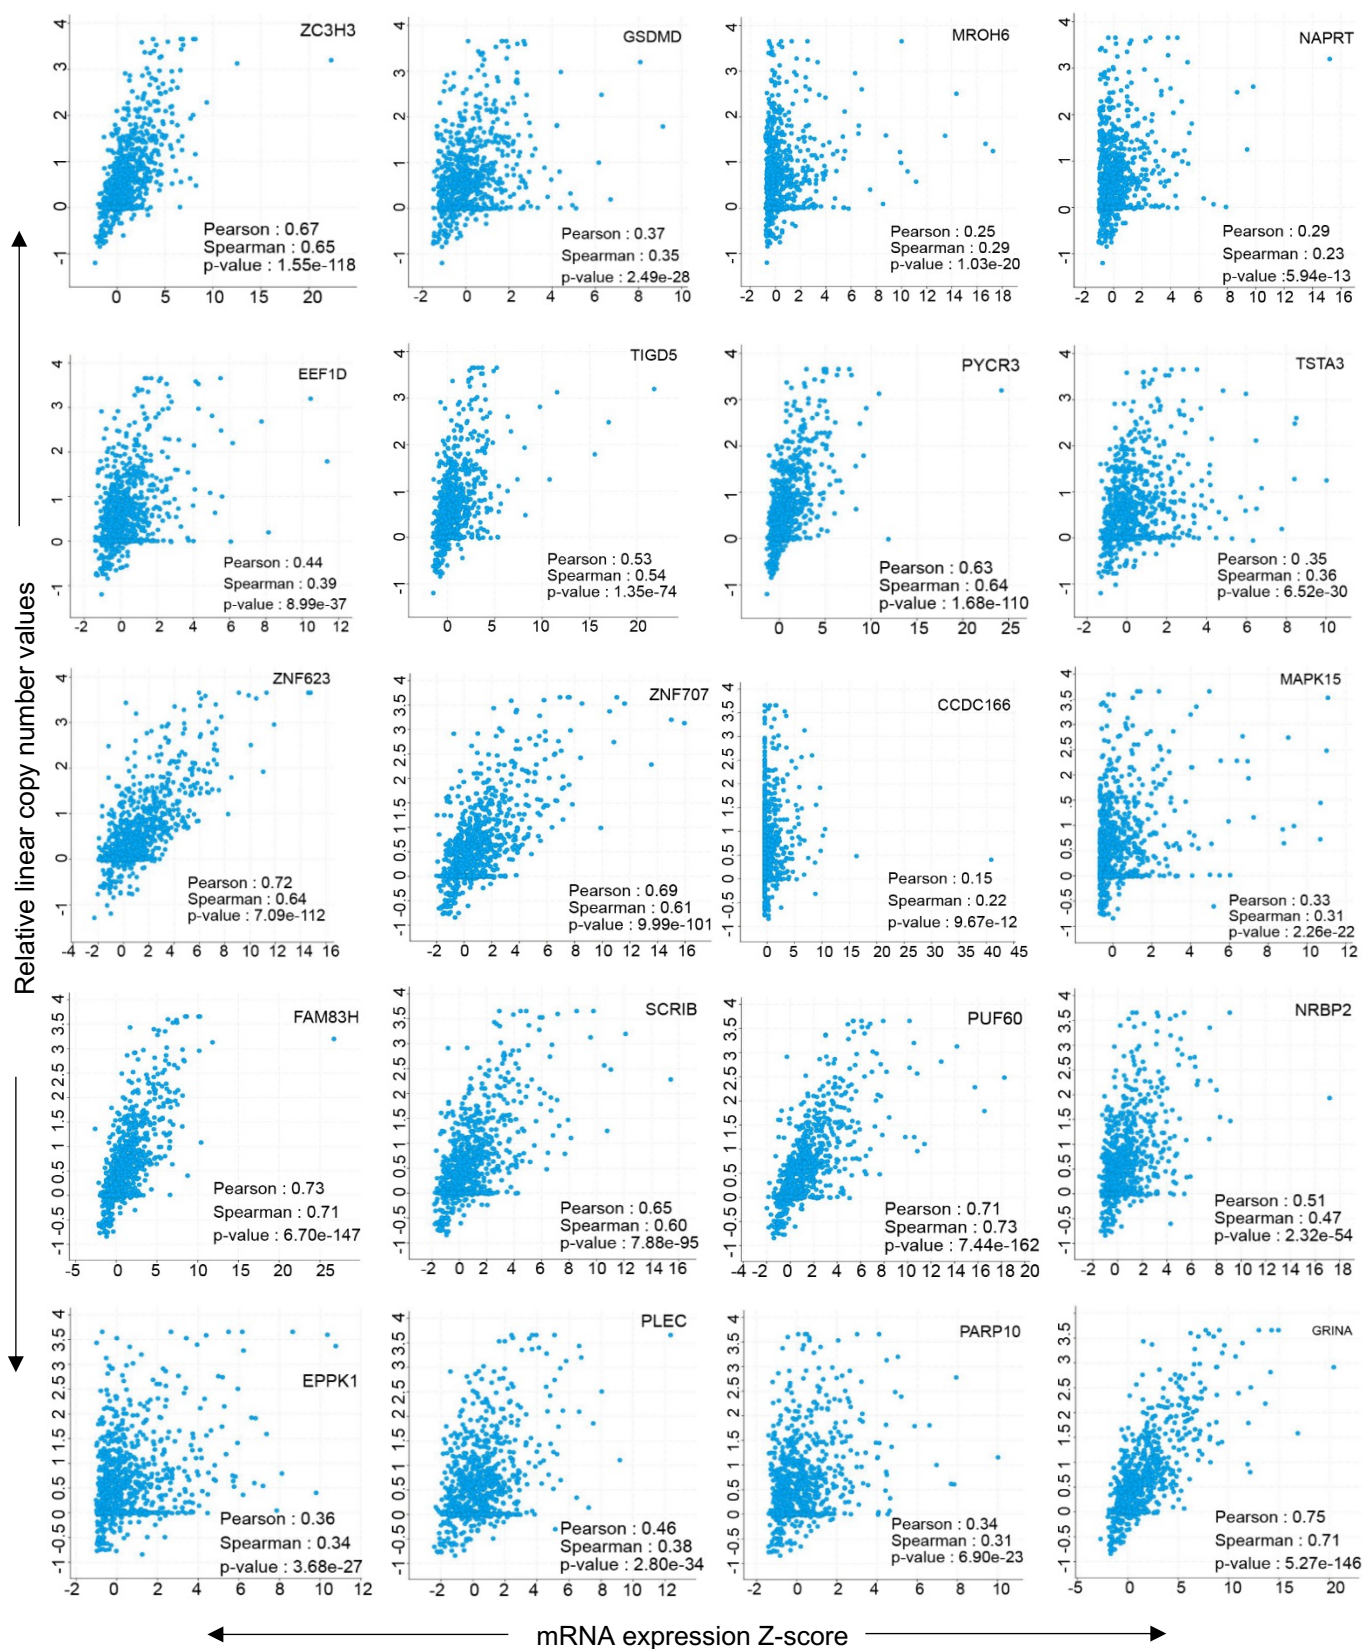

Supplementary Figure S5

Conti.

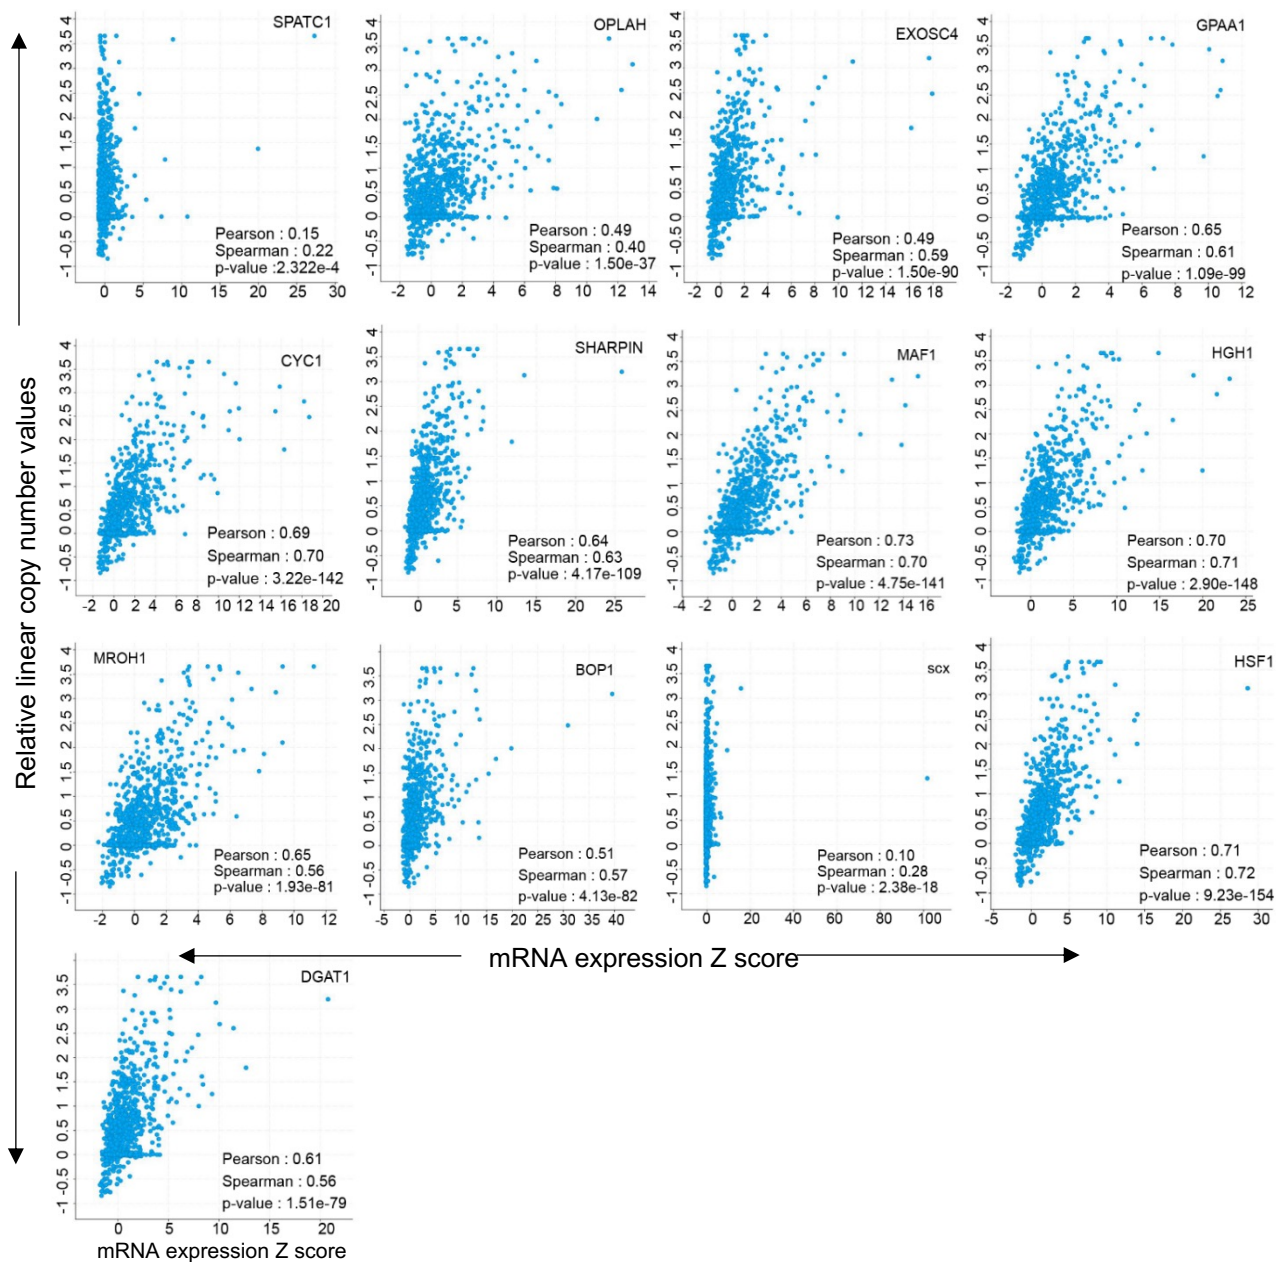

**Supplementary Figure S5:** Correlation between the mRNAs and CNVs of CanCord34 genes. Individual correlation between the mRNA and CNV of CanCord34 genes using the cBioportal dataset. X-axis, mRNA expression; Y-axis, relative copy number.

**A.** Normal, n=11TNBC, n=11

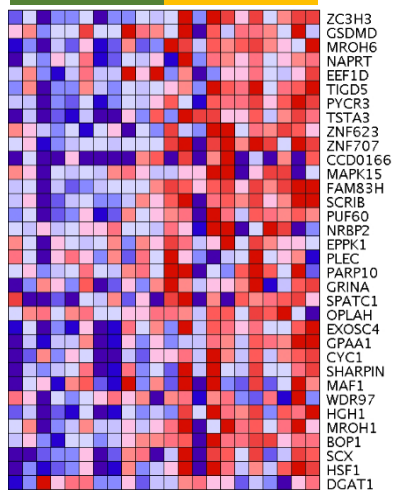

**B.**

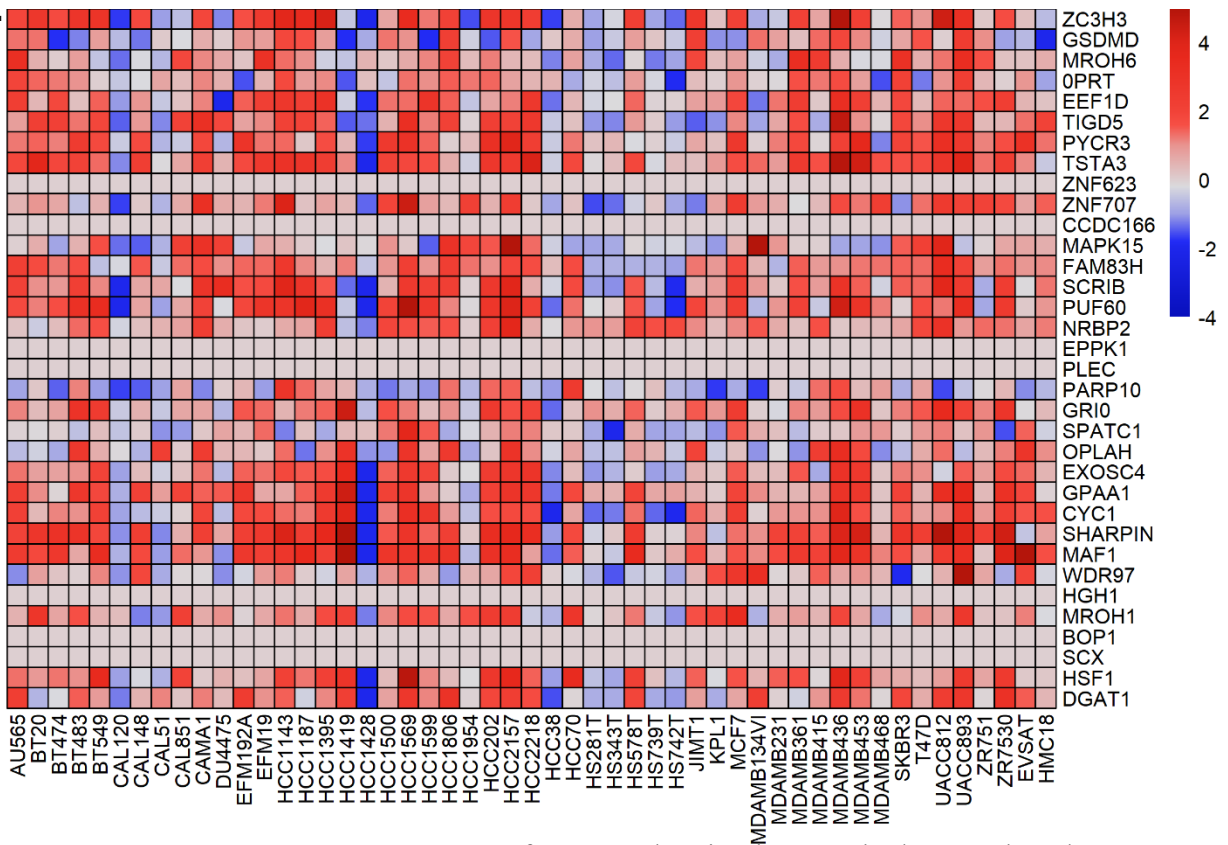

**Supplementary Figure S6:** Status of CanCord34 in the matched normal and breast cancer (A) and 51 breast cancer cell lines using the cBioportal CCLE dataset (B).

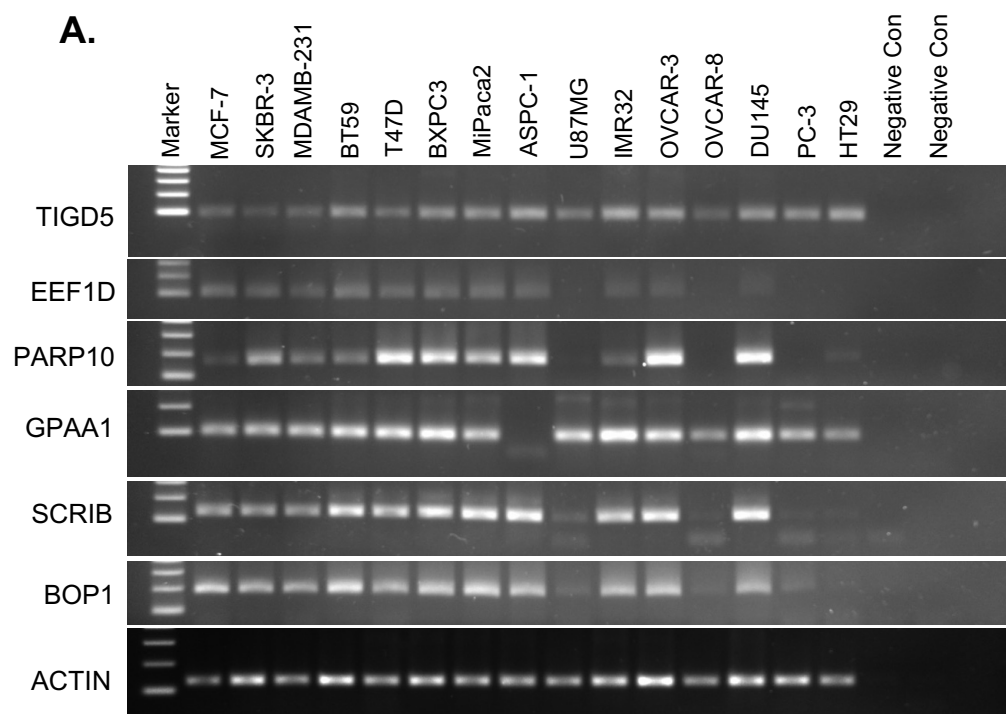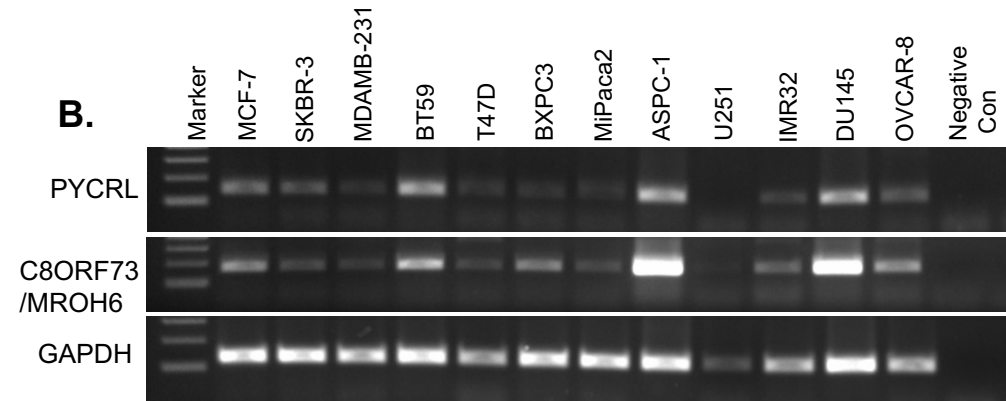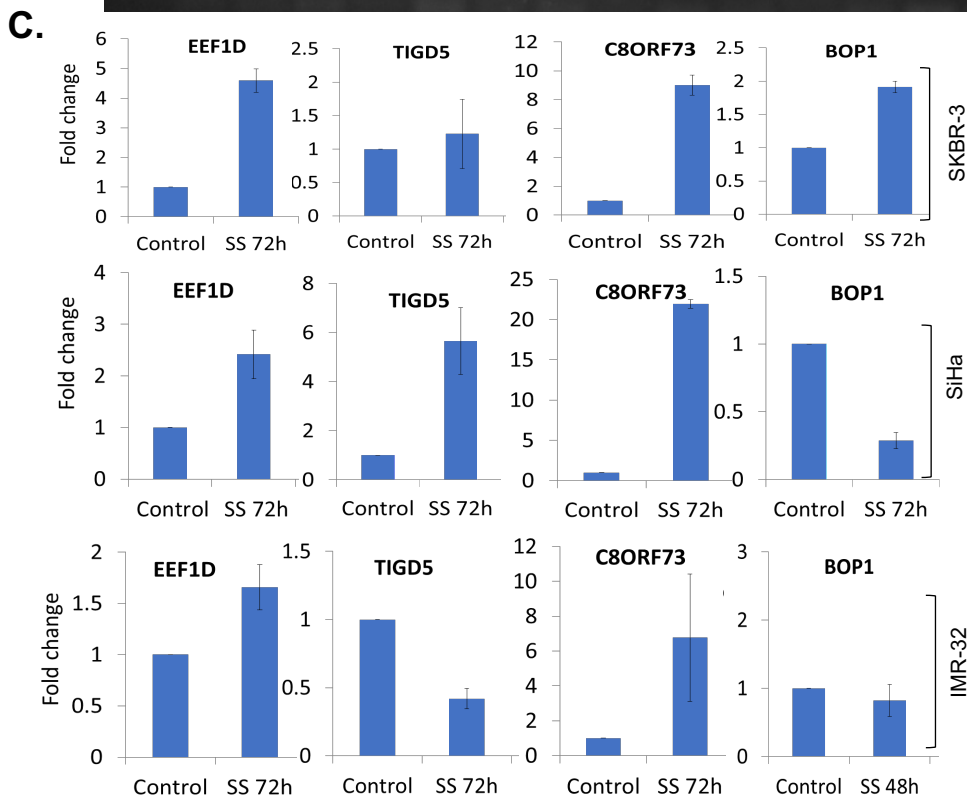

**Supplementary Figure S7A.** Expression of some CanCord34 gene family members in cancer cell lines. (A-B) RT-PCR expression of indicated genes in breast and other cancer cell lines; (C) Relative fold change expression of indicated genes in cancer cell lines. Con, control; SS 72, cells serum-starved for 72 hr.

TIGD5

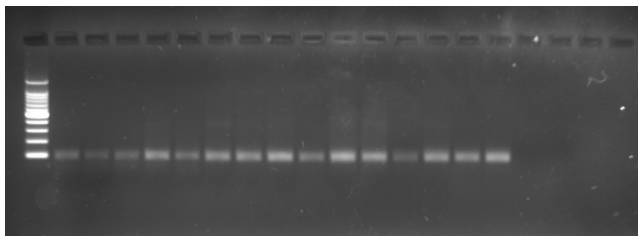

PARP10

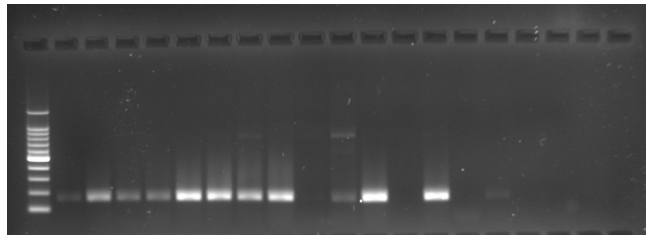

EEF1D

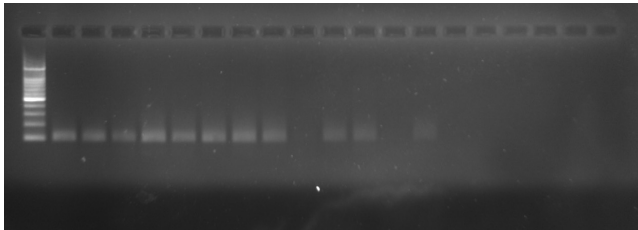

GPAA1

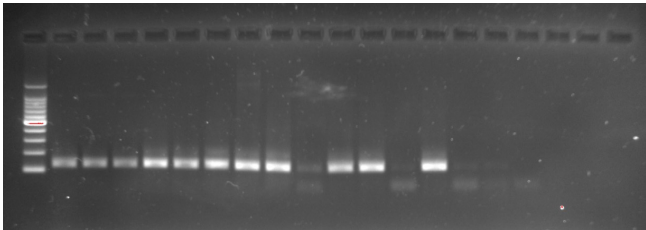

SCRIB

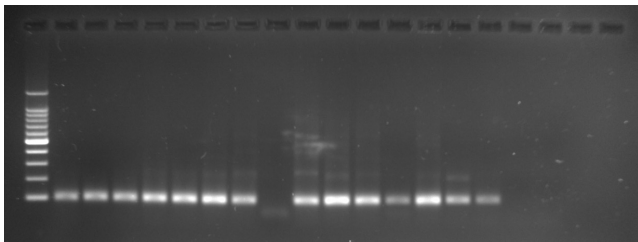

BOP1

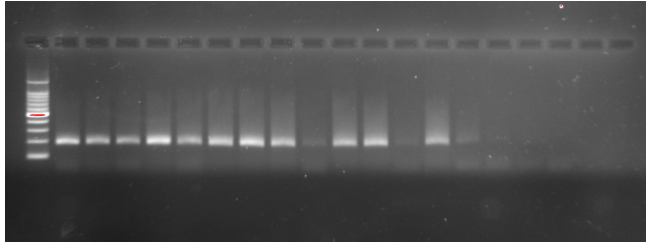

Actin

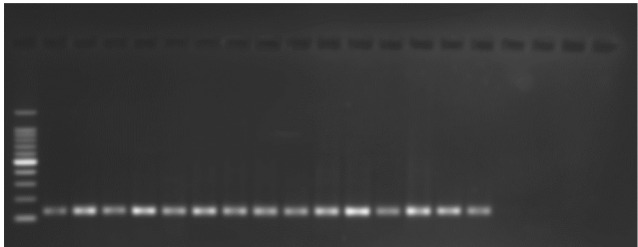

PYCRL

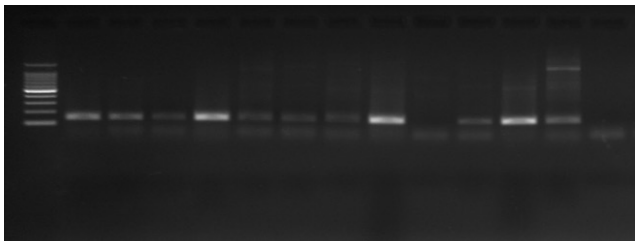

C8ORF73

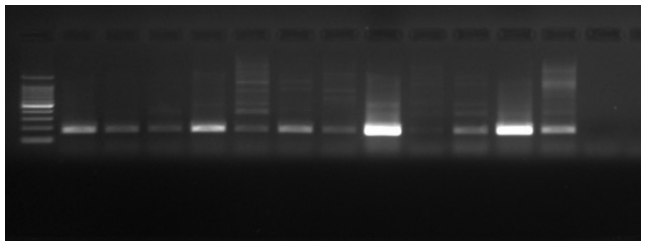

GAPDH

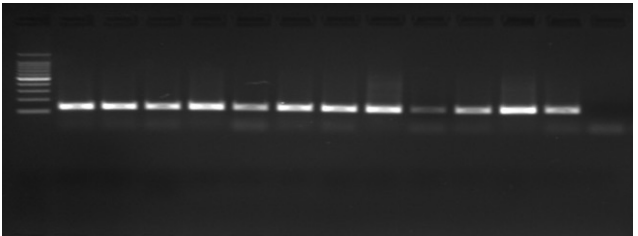

**Supplementary Figure S7B:** RT-PCR gel images of panels used in Supplementary Figure 7A and B.

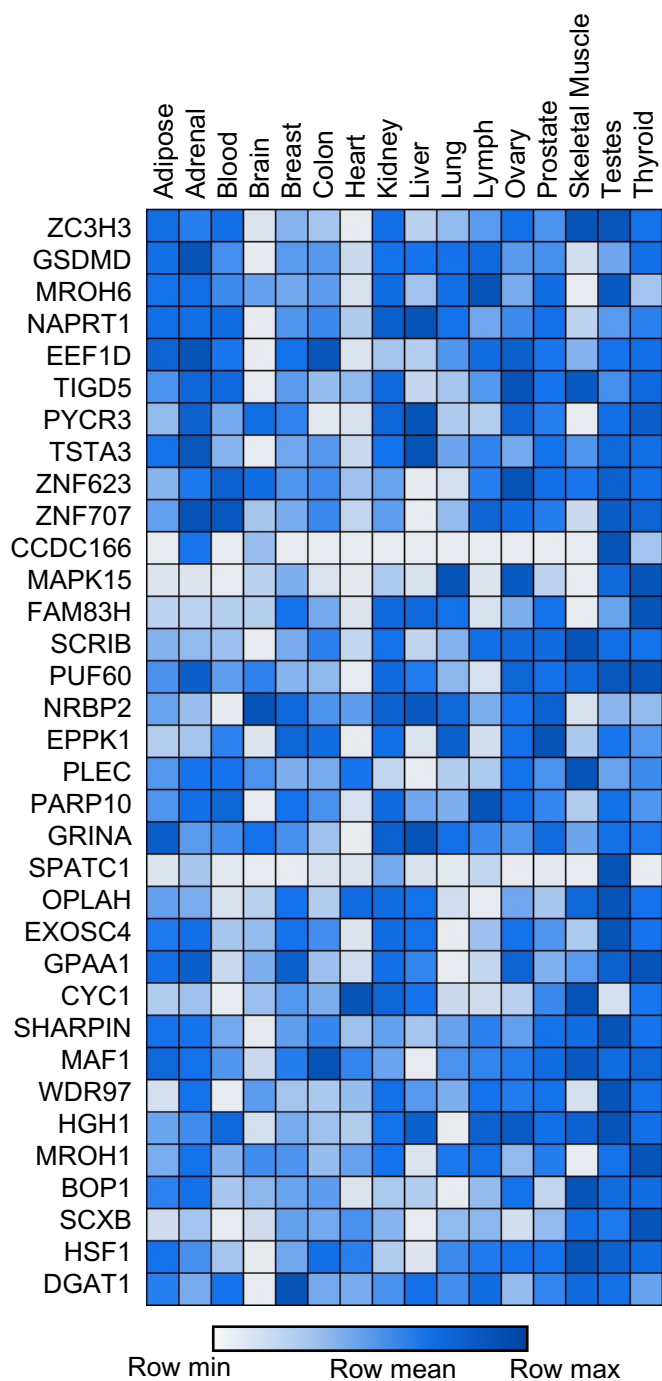

**Supplementary Figure S8:** CanCord34 expression in different clusters of normal tissues and mixture of tissues.

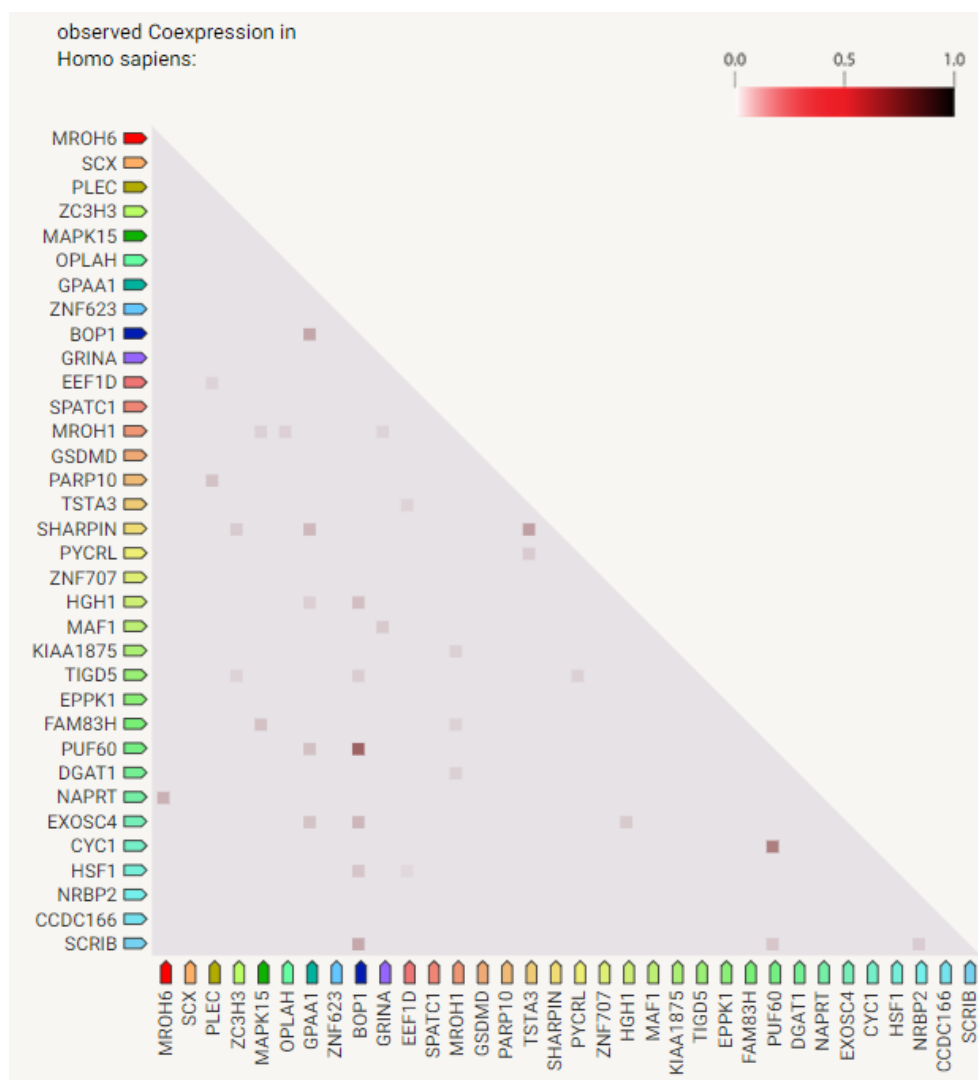

**Supplementary Figure S9:** Status of co-expression of CanCord34 genes in human tissues. The noticed positive correlation of the color intensity with the co-expression scores (Supplementary Table 1) based on the expression of mRNAs and proteins using the STRING program. The color codes in the x and y axis are meant to identify the genes.

**A.** TNBC, N=67 (GSE31519)

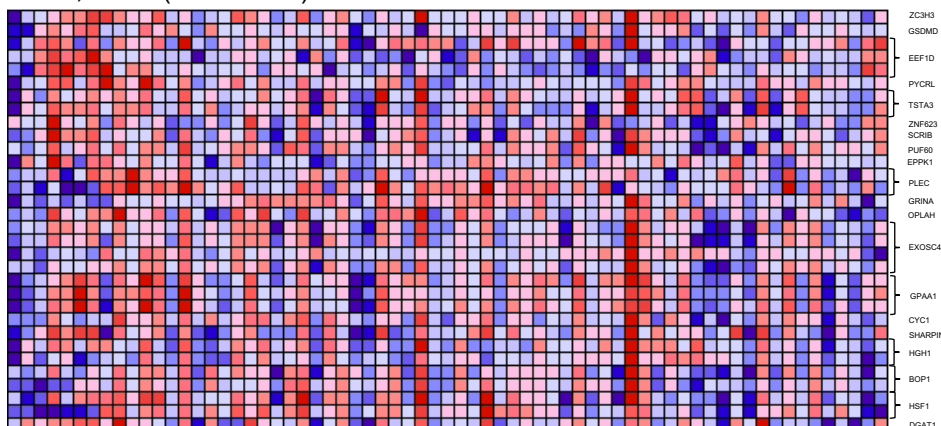

**B.** TNBC, n=107 (GSE58812)

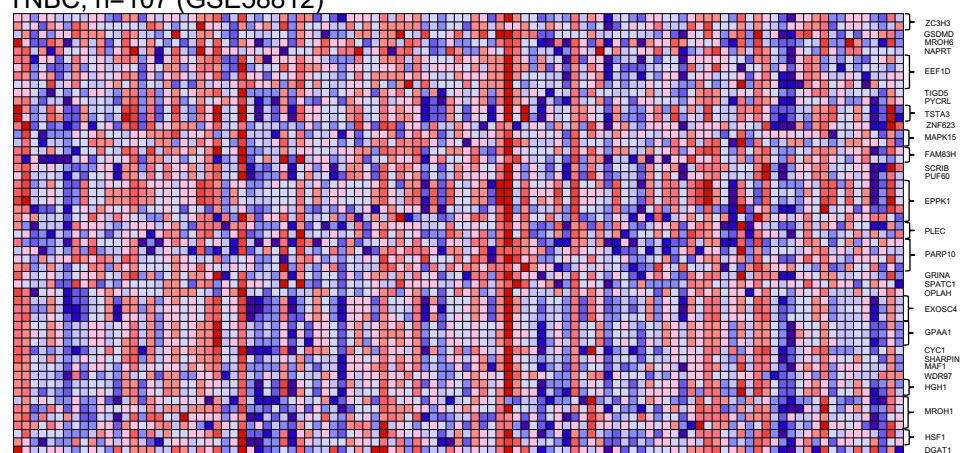

**C.** TNBC, n=238 (GSE83937)

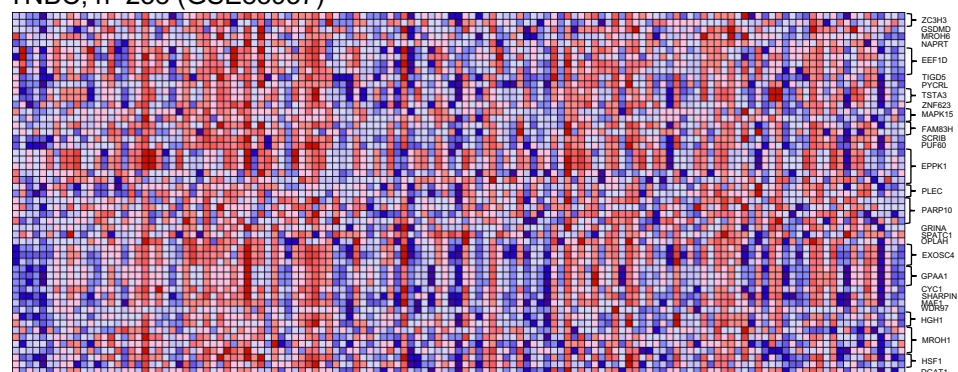

**Supplementary Figure S10:** Heatmap representation of CanCord34 genes in TNBC datasets. (A) GSE31519; (B) GSE58812; (C) GSE83937.

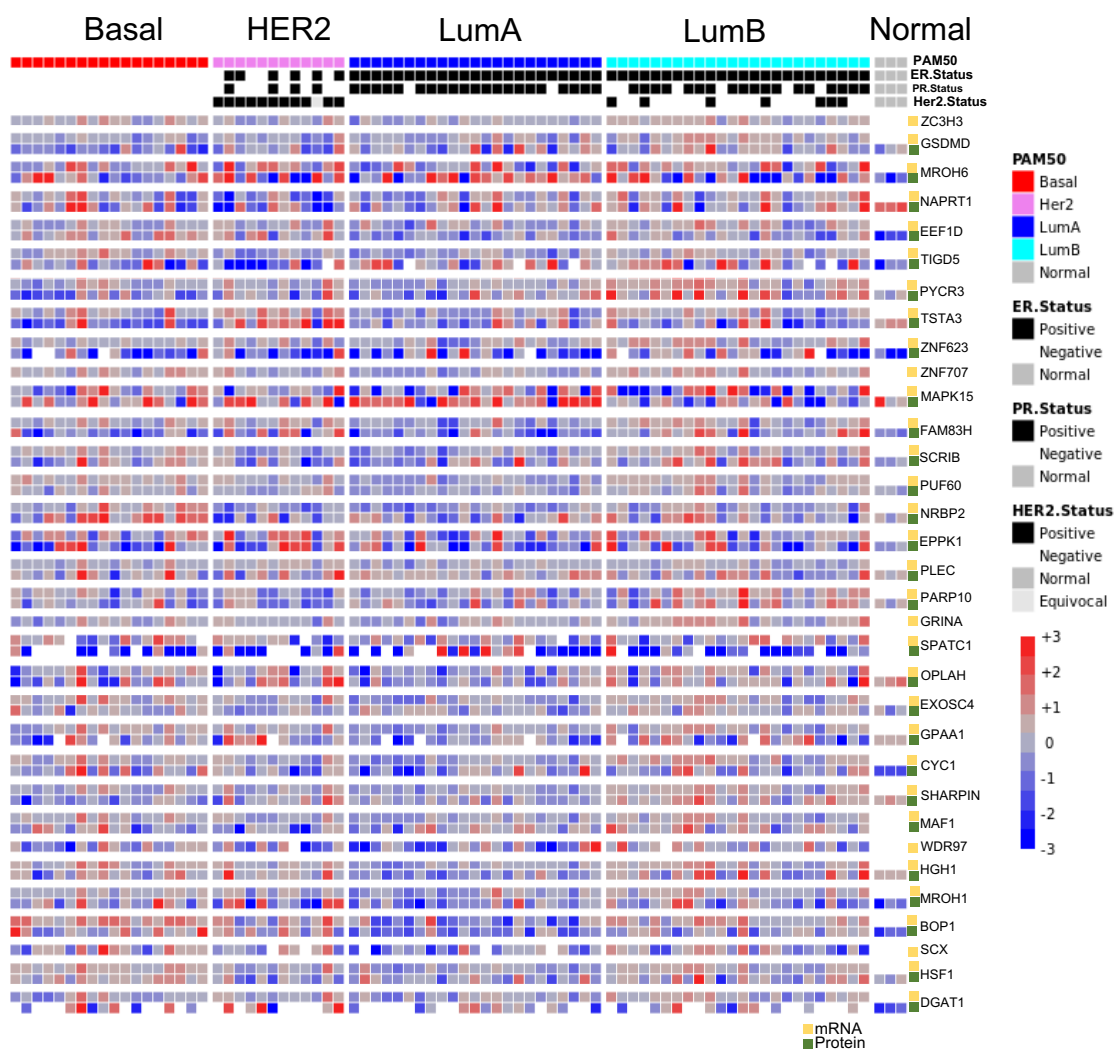

**Supplementary Figure S11:** Proteogenomic expression of CanCord34 genes in breast cancer dataset (37). The expression of CCDC166 was not detectable.

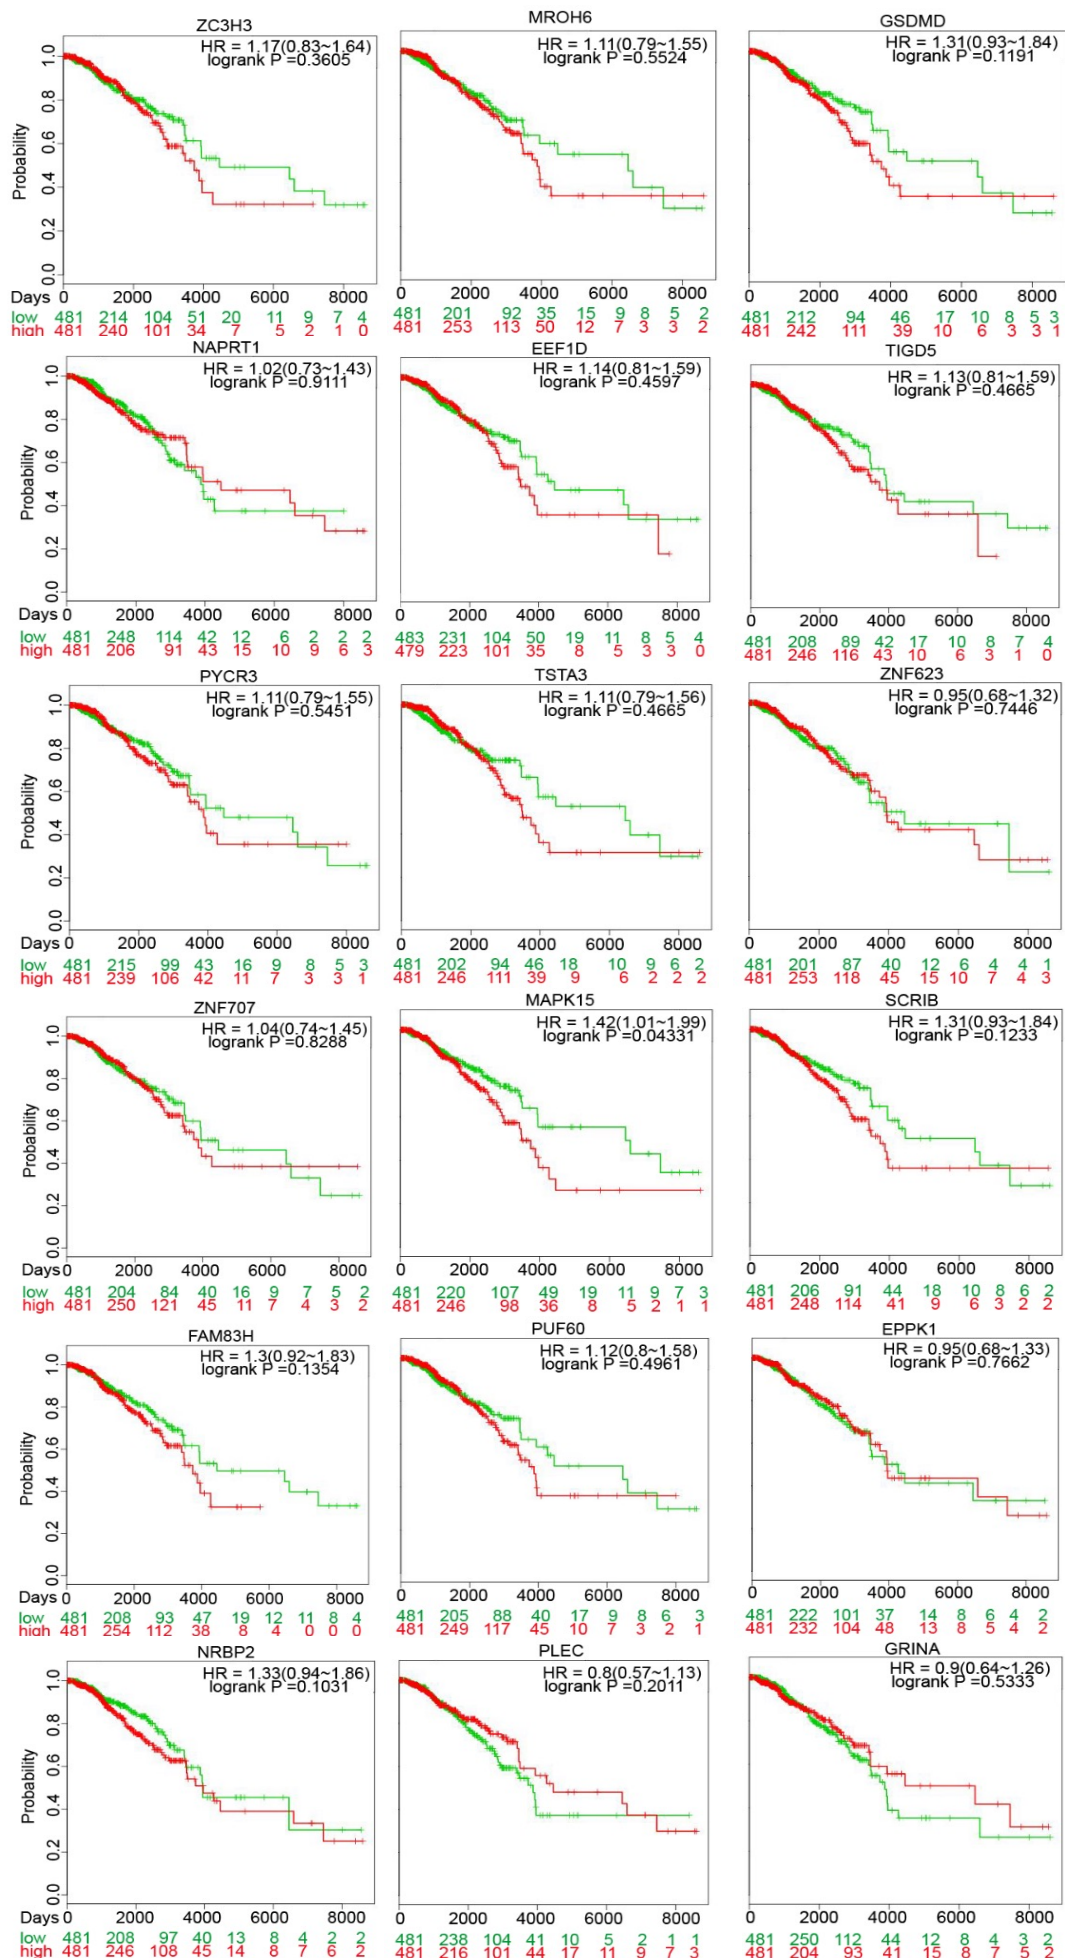

Supplementary Figure S12

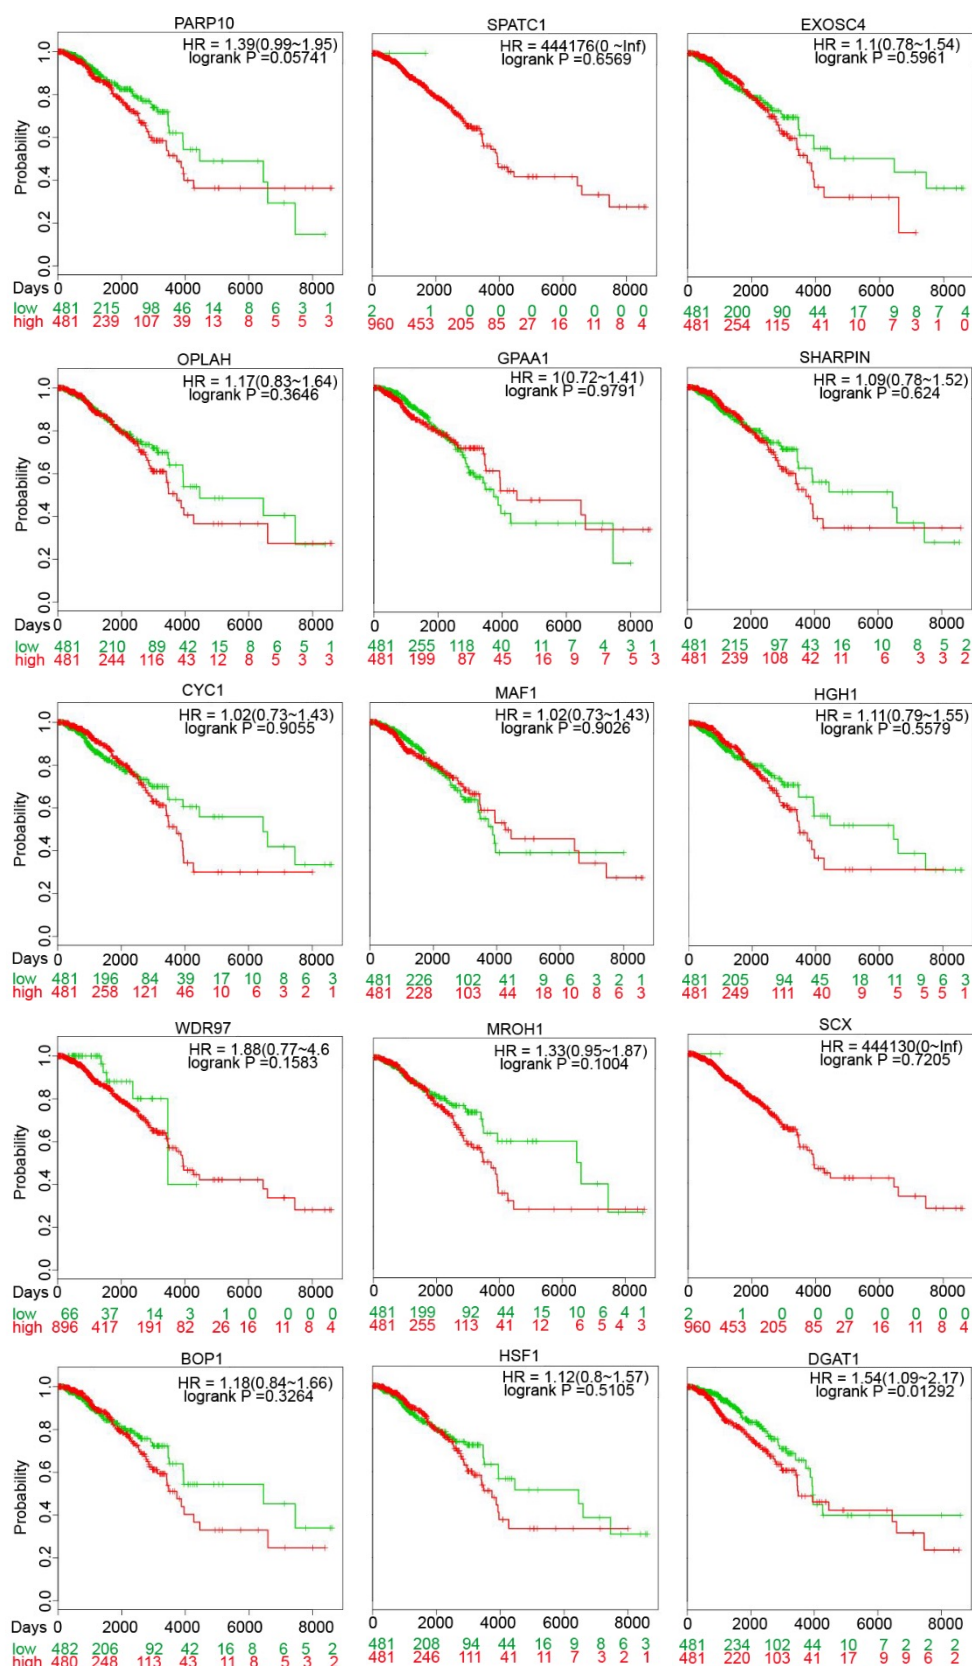

**Supplementary Figure S12:** The Kaplan–Meier survival plots of individual CanCord34 genes in breast cancer. The data represents univariant Kaplan-Meier curves for the low (green) and high (red) overexpressing risk groups, Hazard ratio and p-value of the survival curves are shown. The analysis was performed using the online SurvExpress platform.

|                                                                  | Total<br>sample<br>no | Total No of<br>alteration in<br>sequenced samples | No of<br>gene<br>altered | ZC3H3 | GSDMD | MROH6 | NAPRT | EEF1D | TIGD5 | PYCR3 | TSTA3 | ZNF623 | ZNF707 | CCDC166 | MAPK15 | FAM83H | SCRIB | PUF60 | NRP2 | EPK1 | PLEC | PARP10 | GRNA | SPRY1 | SHC1 | EVOC4 | GPA1 | CYC1 | SHARPIN | MAF1 | WDR97 | HGH1 | MROH1 | BOP1 | SCX | HSF1 | DGAT1 |  |  |
|------------------------------------------------------------------|-----------------------|---------------------------------------------------|--------------------------|-------|-------|-------|-------|-------|-------|-------|-------|--------|--------|---------|--------|--------|-------|-------|------|------|------|--------|------|-------|------|-------|------|------|---------|------|-------|------|-------|------|-----|------|-------|--|--|
| Esophageal Carcinoma                                             | 185                   | 154 (83%) of 185                                  | 33                       |       |       |       |       |       |       |       |       |        |        |         |        |        |       |       |      |      |      |        |      |       |      |       |      |      |         |      |       |      |       |      |     |      |       |  |  |
| Liver Hepatocellular Carcinoma                                   | 373                   | 304 (82%) of 373                                  | 33                       |       |       |       |       |       |       |       |       |        |        |         |        |        |       |       |      |      |      |        |      |       |      |       |      |      |         |      |       |      |       |      |     |      |       |  |  |
| Breast Invasive Carcinoma                                        | 1100                  | 755 (69%) of 1100                                 | 32                       |       |       |       |       |       |       |       |       |        |        |         |        |        |       |       |      |      |      |        |      |       |      |       |      |      |         |      |       |      |       |      |     |      |       |  |  |
| Uveal Melanoma                                                   | 80                    | 73 (90%) of 80                                    | 31                       |       |       |       |       |       |       |       |       |        |        |         |        |        |       |       |      |      |      |        |      |       |      |       |      |      |         |      |       |      |       |      |     |      |       |  |  |
| Kidney Chromophobe                                               | 66                    | 48 (73%) of 66                                    | 31                       |       |       |       |       |       |       |       |       |        |        |         |        |        |       |       |      |      |      |        |      |       |      |       |      |      |         |      |       |      |       |      |     |      |       |  |  |
| Lung Adenocarcinoma                                              | 517                   | 369 (71%) of 517                                  | 31                       |       |       |       |       |       |       |       |       |        |        |         |        |        |       |       |      |      |      |        |      |       |      |       |      |      |         |      |       |      |       |      |     |      |       |  |  |
| Lung Squamous Cell Carcinoma                                     | 501                   | 363 (72%) of 501                                  | 31                       |       |       |       |       |       |       |       |       |        |        |         |        |        |       |       |      |      |      |        |      |       |      |       |      |      |         |      |       |      |       |      |     |      |       |  |  |
| Ovarian Serous Cystadenocarcinoma                                | 307                   | 275 (90%) of 307                                  | 32                       |       |       |       |       |       |       |       |       |        |        |         |        |        |       |       |      |      |      |        |      |       |      |       |      |      |         |      |       |      |       |      |     |      |       |  |  |
| Prostate Adenocarcinoma                                          | 498                   | 279 (56%) of 498                                  | 32                       |       |       |       |       |       |       |       |       |        |        |         |        |        |       |       |      |      |      |        |      |       |      |       |      |      |         |      |       |      |       |      |     |      |       |  |  |
| Skin Cutaneous Melanoma                                          | 472                   | 279 (59%) of 472                                  | 31                       |       |       |       |       |       |       |       |       |        |        |         |        |        |       |       |      |      |      |        |      |       |      |       |      |      |         |      |       |      |       |      |     |      |       |  |  |
| Cholangiocarcinoma                                               | 36                    | 25 (69%) of 36                                    | 31                       |       |       |       |       |       |       |       |       |        |        |         |        |        |       |       |      |      |      |        |      |       |      |       |      |      |         |      |       |      |       |      |     |      |       |  |  |
| Bladder Urothelial Carcinoma                                     | 408                   | 297 (73%) of 408                                  | 31                       |       |       |       |       |       |       |       |       |        |        |         |        |        |       |       |      |      |      |        |      |       |      |       |      |      |         |      |       |      |       |      |     |      |       |  |  |
| Colorectal Adenocarcinoma                                        | 382                   | 296 (78%) of 382                                  | 31                       |       |       |       |       |       |       |       |       |        |        |         |        |        |       |       |      |      |      |        |      |       |      |       |      |      |         |      |       |      |       |      |     |      |       |  |  |
| Cervical Squamous Cell Carcinoma and Endocervical Adenocarcinoma | 306                   | 202 (66%) of 306                                  | 30                       |       |       |       |       |       |       |       |       |        |        |         |        |        |       |       |      |      |      |        |      |       |      |       |      |      |         |      |       |      |       |      |     |      |       |  |  |
| Stomach Adenocarcinoma                                           | 415                   | 320 (77%) of 415                                  | 31                       |       |       |       |       |       |       |       |       |        |        |         |        |        |       |       |      |      |      |        |      |       |      |       |      |      |         |      |       |      |       |      |     |      |       |  |  |
| Head and Neck Squamous Cell Carcinoma                            | 522                   | 392 (75%) of 522                                  | 31                       |       |       |       |       |       |       |       |       |        |        |         |        |        |       |       |      |      |      |        |      |       |      |       |      |      |         |      |       |      |       |      |     |      |       |  |  |
| Uterine Corpus Endometrial Carcinoma                             | 177                   | 118 (67%) of 177                                  | 31                       |       |       |       |       |       |       |       |       |        |        |         |        |        |       |       |      |      |      |        |      |       |      |       |      |      |         |      |       |      |       |      |     |      |       |  |  |
| Mesothelioma                                                     | 87                    | 59 (68%) of 87                                    | 30                       |       |       |       |       |       |       |       |       |        |        |         |        |        |       |       |      |      |      |        |      |       |      |       |      |      |         |      |       |      |       |      |     |      |       |  |  |
| Uterine Carcinosarcoma                                           | 57                    | 52 (91%) of 57                                    | 29                       |       |       |       |       |       |       |       |       |        |        |         |        |        |       |       |      |      |      |        |      |       |      |       |      |      |         |      |       |      |       |      |     |      |       |  |  |
| Adrenocortical Carcinoma                                         | 79                    | 57 (72%) of 79                                    | 29                       |       |       |       |       |       |       |       |       |        |        |         |        |        |       |       |      |      |      |        |      |       |      |       |      |      |         |      |       |      |       |      |     |      |       |  |  |
| Acute Myeloid Leukemia                                           | 173                   | 93 (54%) of 173                                   | 29                       |       |       |       |       |       |       |       |       |        |        |         |        |        |       |       |      |      |      |        |      |       |      |       |      |      |         |      |       |      |       |      |     |      |       |  |  |
| Testicular Germ Cell Cancer                                      | 156                   | 121 (78%) of 156                                  | 28                       |       |       |       |       |       |       |       |       |        |        |         |        |        |       |       |      |      |      |        |      |       |      |       |      |      |         |      |       |      |       |      |     |      |       |  |  |
| Pancreatic Adenocarcinoma                                        | 179                   | 107 (60%) of 179                                  | 28                       |       |       |       |       |       |       |       |       |        |        |         |        |        |       |       |      |      |      |        |      |       |      |       |      |      |         |      |       |      |       |      |     |      |       |  |  |
| Brain Lower Grade Glioma                                         | 530                   | 287 (56%) of 530                                  | 27                       |       |       |       |       |       |       |       |       |        |        |         |        |        |       |       |      |      |      |        |      |       |      |       |      |      |         |      |       |      |       |      |     |      |       |  |  |
| Kidney Renal Papillary Cell Carcinoma                            | 291                   | 153 (53%) of 291                                  | 27                       |       |       |       |       |       |       |       |       |        |        |         |        |        |       |       |      |      |      |        |      |       |      |       |      |      |         |      |       |      |       |      |     |      |       |  |  |
| Glioblastoma Multiforme                                          | 166                   | 95 (59%) of 166                                   | 26                       |       |       |       |       |       |       |       |       |        |        |         |        |        |       |       |      |      |      |        |      |       |      |       |      |      |         |      |       |      |       |      |     |      |       |  |  |
| Kidney Renal Clear Cell Carcinoma                                | 448                   | 176 (39%) of 448                                  | 22                       |       |       |       |       |       |       |       |       |        |        |         |        |        |       |       |      |      |      |        |      |       |      |       |      |      |         |      |       |      |       |      |     |      |       |  |  |
| Thymoma                                                          | 120                   | 65 (54%) of 120                                   | 21                       |       |       |       |       |       |       |       |       |        |        |         |        |        |       |       |      |      |      |        |      |       |      |       |      |      |         |      |       |      |       |      |     |      |       |  |  |
| Lymphoid Neoplasm Diffuse Large B-cell Lymphoma                  | 48                    | 32 (67%) of 48                                    | 20                       |       |       |       |       |       |       |       |       |        |        |         |        |        |       |       |      |      |      |        |      |       |      |       |      |      |         |      |       |      |       |      |     |      |       |  |  |

**Supplementary Figure S13:** Overview of alterations/upregulation of CanCord34 genes in human cancer with a minimum alteration rate of 5%. Red block, genes passed the minimum threshold; and white block, otherwise.

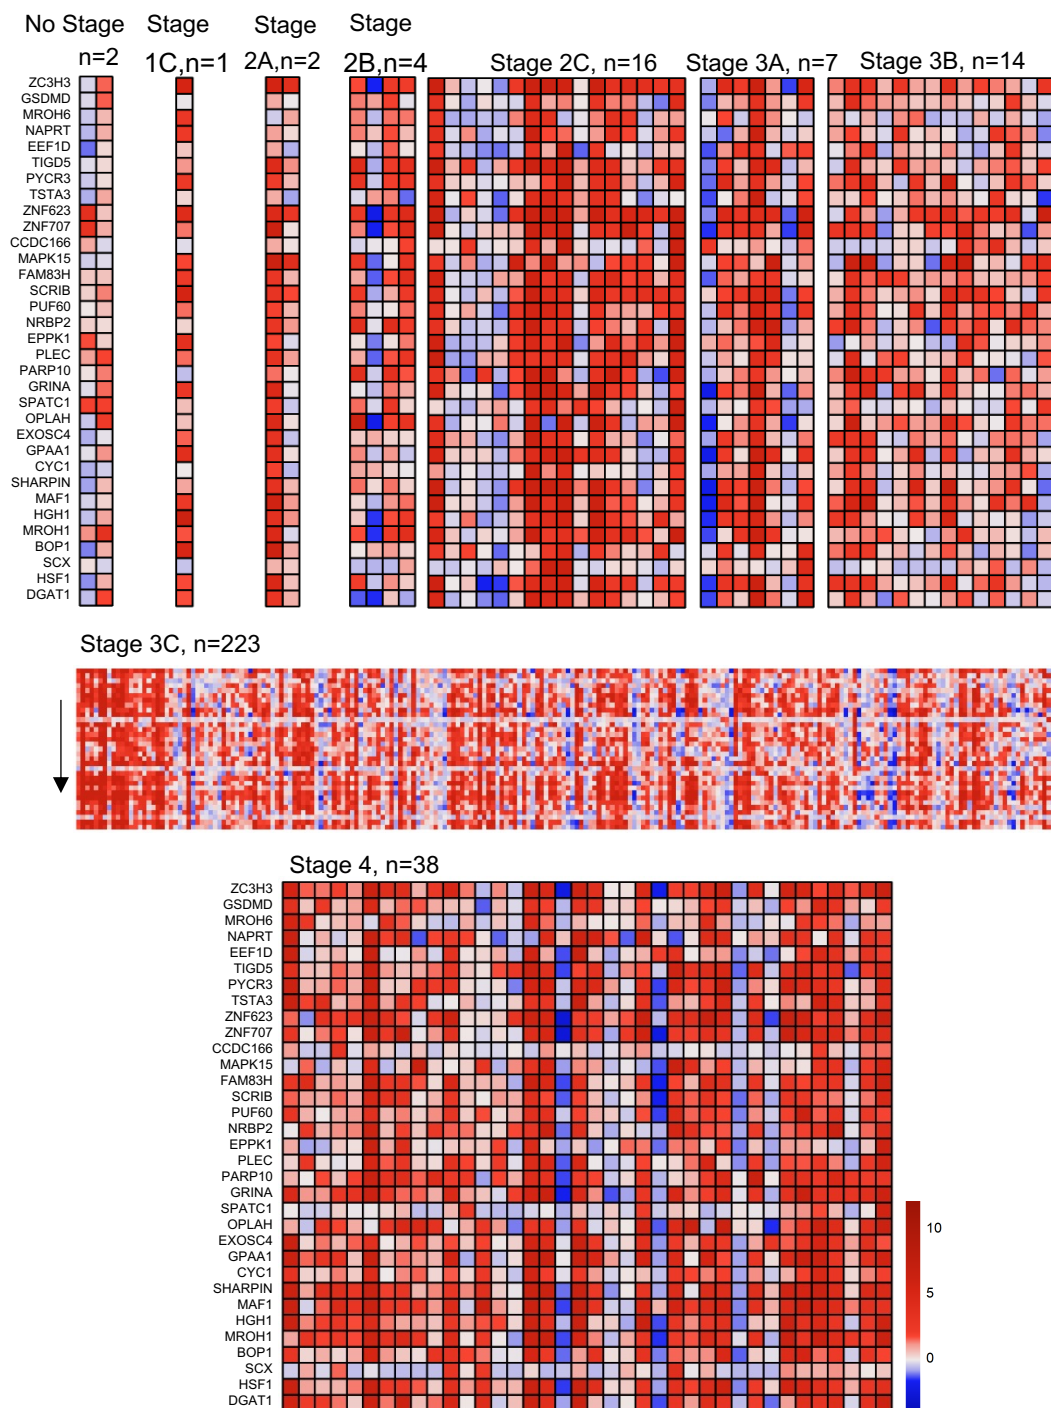

**Supplementary Figure S14:** Disease stage-wise representation of CanCord34 genes expression in ovarian cancer. The color represents the z-score of gene expression. WDR97 gene expression was absent in the database, and hence, eliminated from the representation here. The datasets were curated from the cBioportal database.

### A. Biological process

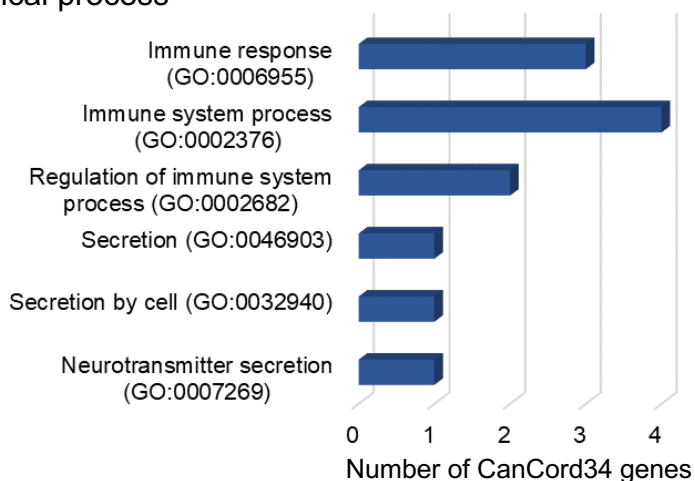

### B. Molecular function

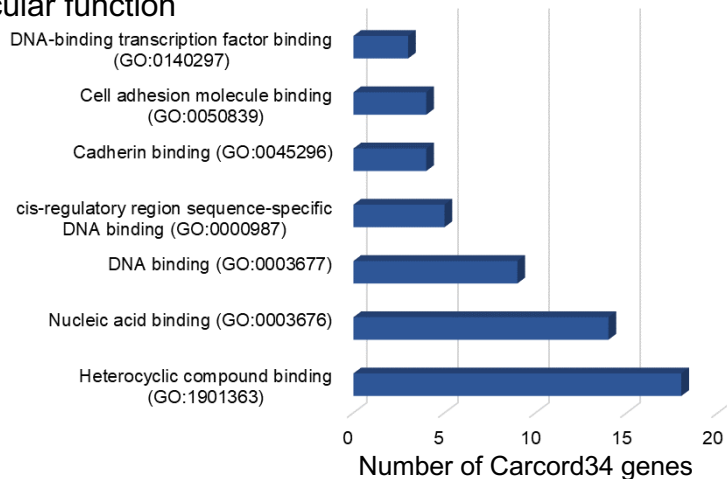

**Supplementary Figure S15:** Gene ontology enrichment analysis of CanCord34 genes. GO functional enrichment for CanCord34 genes were performed using Panther db. Significantly enriched top (A) Biological process and (B) Molecular functions are represented in separate bar charts.

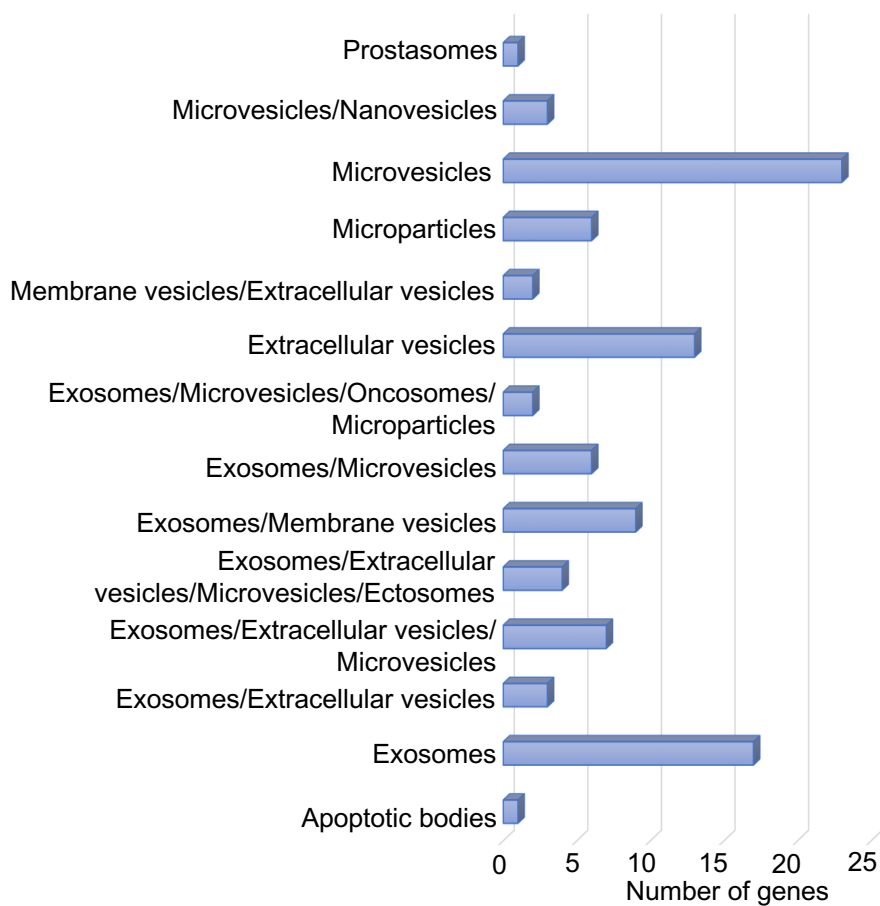

**Supplementary Figure S16:** CanCord34 genes as secretory molecules using the data retrieved from the VESICLEPEDIA.

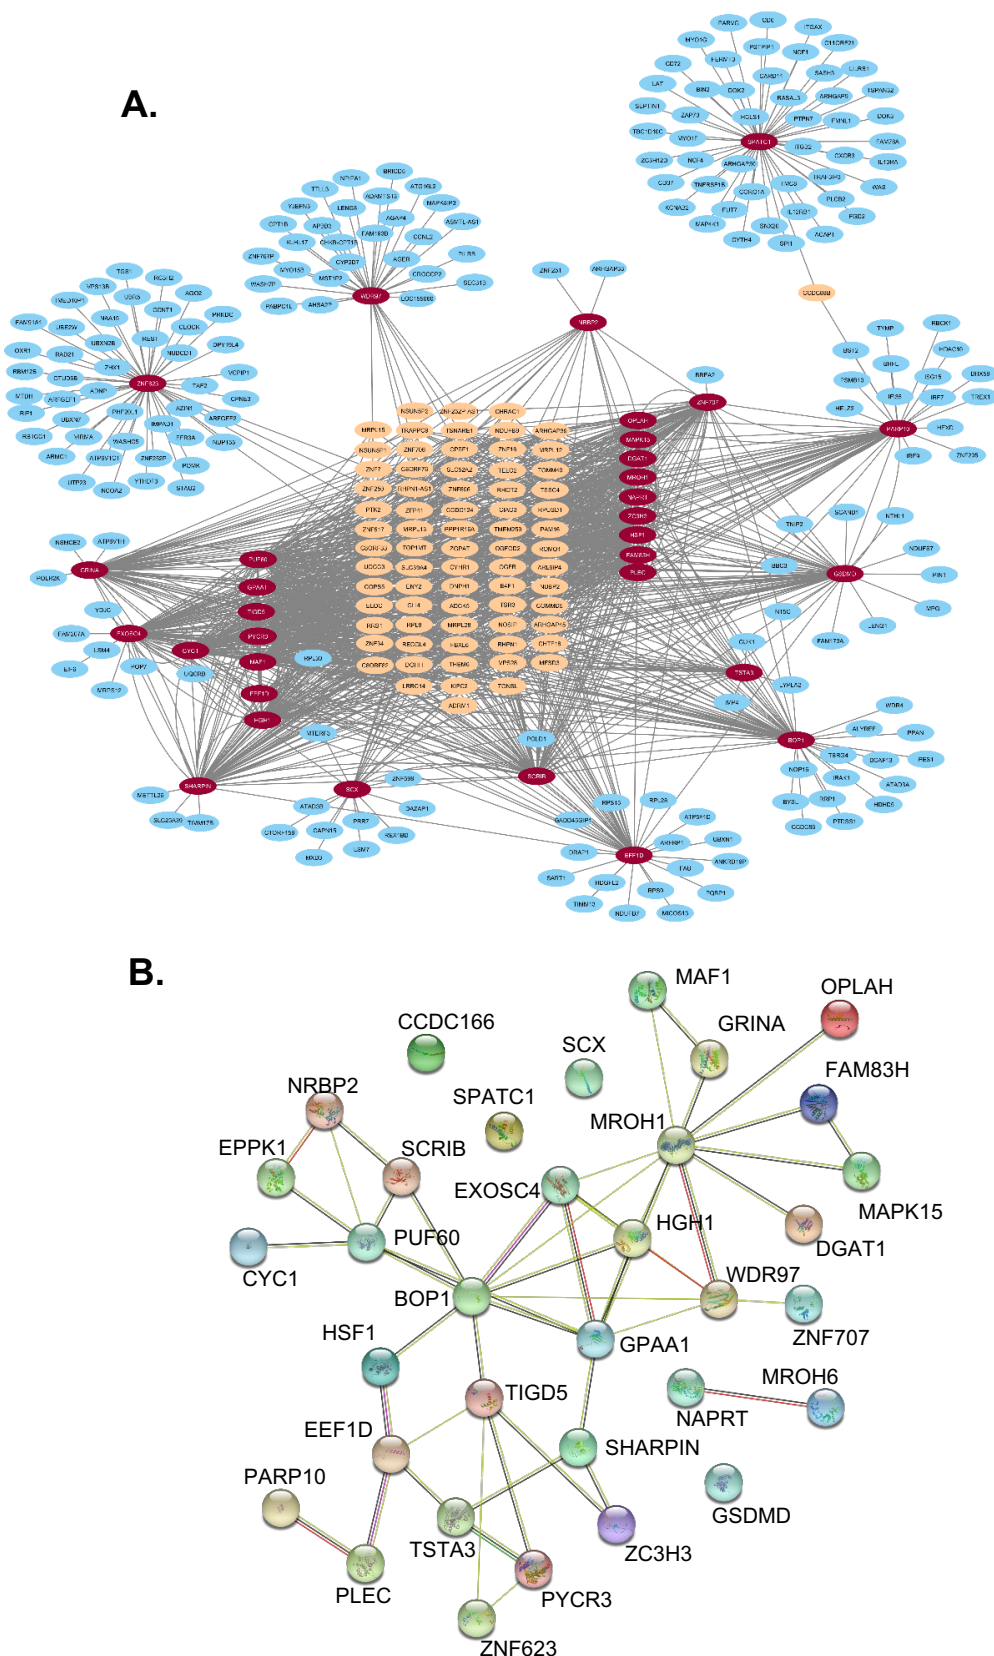

**Supplementary Figure S17: Interconnection among CanCord genes in breast cancer.** (A) Shared correlated genes among the CanCord34 are aligned towards the centre for the diagram; and CanCord34 genes are depicted in brown red. The top correlated genes with a  $r$ -value of  $>0.5$  were considered for data presented. (B) Functional protein-protein interaction using the STRING online program.

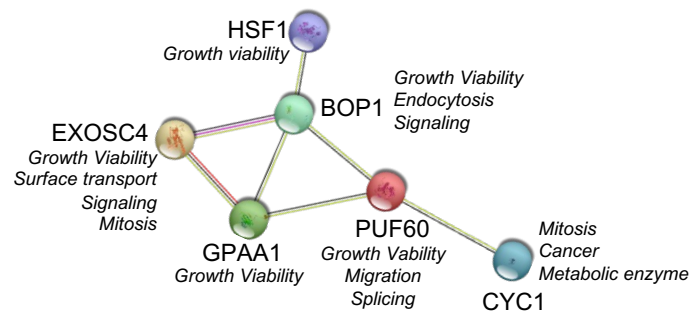

**Supplementary Figure S18:** Curated functions from Genome RNAi database (51) and evidence of protein-protein from STRING analysis of six of CanCord34 genes which has shown potential role in the cell viability.

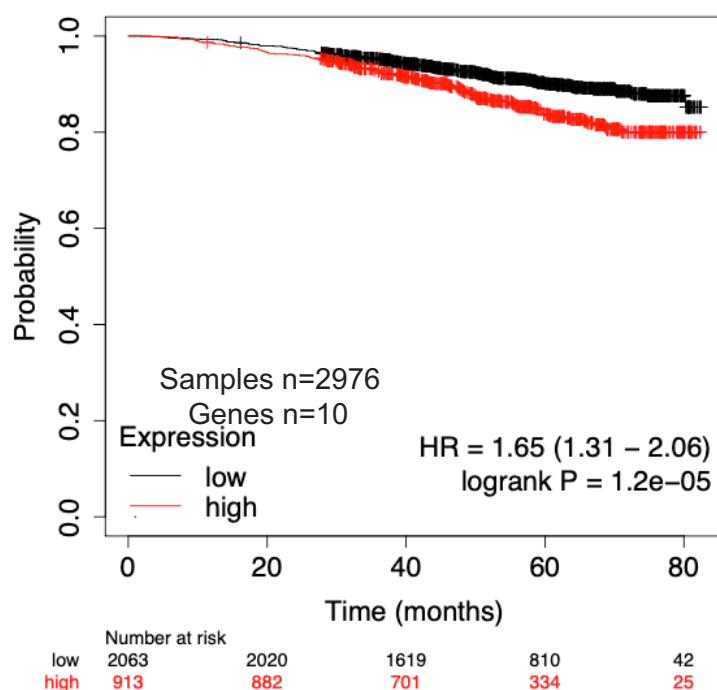

**Supplementary Figure S19:** The Kaplan–Meier survival plots of 10 secreted genes in breast cancer. The data represents multivariant Kaplan–Meier curves of 10 CanCord34 genes present in the secreted MVs. These genes include, PLEC, GSDMD, SCRIB, EXOSC4, CYC1, GPAA1, GRINA, HSF1, PUF60 and MAF1. Black and red curves represent the low and high expressing groups. The analysis was performed using an online KMplot platform.

## CanCord34 genes

|         |        |        |        |        |        |        |        |         |         |         |         |         |         |         |         |        |         |         |         |         |         |         |         |       |       |       |    |
|---------|--------|--------|--------|--------|--------|--------|--------|---------|---------|---------|---------|---------|---------|---------|---------|--------|---------|---------|---------|---------|---------|---------|---------|-------|-------|-------|----|
| SPDEF   | GPAA1  | MAPK15 | WDR97  | SPATC1 | MAF1   | ZNF623 | ZNF707 | BOP1    | SCRIB   | DGAT1   | MAFA    | EPK1    | EEF1D   | CCDC166 | FAM83H  | MROH6  | NAPRT   | NRBP2   | OPLAH   | PARP10  | PLEC    | PUF60   | SHARPIN | TSTA3 | ZC3H3 | PYCR3 | 26 |
| CTCF    | CYC1   | EXOSC4 | HGH1   | MROH1  | GSDMD  | GRINA  | TIGD5  | WDR97   | SPATC1  | MAF1    | SCRIB   | DGAT1   | MAFA    | EEF1D   | FAM83H  | MROH6  | NAPRT   | OPLAH   | PARP10  | PLEC    | PUF60   | SHARPIN | TSTA3   | ZC3H3 | PYCR3 |       | 24 |
| ELF1    | CYC1   | EXOSC4 | GPAA1  | HSF1   | GSDMD  | TIGD5  | WDR97  | MAF1    | ZNF623  | ZNF707  | BOP1    | SCRIB   | DGAT1   | EPK1    | EEF1D   | FAM83H | MROH6   | NAPRT   | PLEC    | PUF60   | SHARPIN | TSTA3   | ZC3H3   | PYCR3 |       | 24    |    |
| MYC     | EXOSC4 | GPAA1  | HGH1   | MROH1  | MAPK15 | GSDMD  | GRINA  | TIGD5   | SPATC1  | ZNF623  | ZNF707  | BOP1    | SCRIB   | DGAT1   | MAFA    | EEF1D  | FAM83H  | MROH6   | NAPRT   | PARP10  | PLEC    | PUF60   | SHARPIN | TSTA3 | PYCR3 |       | 23 |
| EGR1    | CYC1   | GPAA1  | MAPK15 | GSDMD  | GRINA  | TIGD5  | WDR97  | MAF1    | ZNF623  | ZNF707  | SCRIB   | MAFA    | EPK1    | EEF1D   | FAM83H  | NRBP2  | PLEC    | PUF60   | NRBP2   | SHARPIN | TSTA3   | PYCR3   |         |       |       | 21    |    |
| YY1     | CYC1   | GPAA1  | MAPK15 | GRINA  | TIGD5  | WDR97  | MAF1   | ZNF707  | BOP1    | DGAT1   | MAFA    | CCDC166 | MROH6   | NAPRT   | NRBP2   | OPLAH  | PLEC    | PUF60   | SHARPIN | TSTA3   | PYCR3   |         |         |       |       | 21    |    |
| PAX5    | EXOSC4 | GPAA1  | HGH1   | MROH1  | GSDMD  | GRINA  | TIGD5  | SPATC1  | ZNF623  | ZNF707  | BOP1    | SCRIB   | NAPRT   | PARP10  | PLEC    | PUF60  | SHARPIN | TSTA3   | ZC3H3   | PYCR3   |         |         |         |       |       | 20    |    |
| SHAI2   | CYC1   | GPAA1  | HGH1   | MAPK15 | SCX    | GSDMD  | WDR97  | MAF1    | SCRIB   | DGAT1   | EPK1    | CCDC166 | FAM83H  | MROH6   | NAPRT   | NRBP2  | PLEC    | SHARPIN | TSTA3   | PYCR3   |         |         |         |       |       | 20    |    |
| SP1     | CYC1   | GPAA1  | HGH1   | MROH1  | MAPK15 | GRINA  | TIGD5  | MAF1    | SCRIB   | DGAT1   | MAFA    | EPK1    | MROH6   | NAPRT   | NRBP2   | PLEC   | PUF60   | TSTA3   | ZC3H3   | PYCR3   |         |         |         |       |       | 20    |    |
| KLFS    | CYC1   | EXOSC4 | HSF1   | GSDMD  | GRINA  | TIGD5  | MAF1   | ZNF623  | ZNF707  | BOP1    | SCRIB   | EPK1    | FAM83H  | NAPRT   | NRBP2   | PLEC   | PUF60   | TSTA3   | PYCR3   |         |         |         |         |       |       | 19    |    |
| RELA    | CYC1   | EXOSC4 | GPAA1  | MAPK15 | GSDMD  | GRINA  | TIGD5  | SPATC1  | MAF1    | ZNF623  | ZNF707  | SCRIB   | DGAT1   | MAFA    | NRBP2   | PARP10 | PLEC    | PUF60   | TSTA3   |         |         |         |         |       |       | 19    |    |
| ZNF552  | CYC1   | HGH1   | MROH1  | MAPK15 | SCX    | GRINA  | TIGD5  | WDR97   | BOP1    | SCRIB   | MAFA    | EPK1    | CCDC166 | FAM83H  | MROH6   | NRBP2  | PUF60   | SHARPIN | PYCR3   |         |         |         |         |       |       | 19    |    |
| GABPA   | EXOSC4 | GPAA1  | HGH1   | HSF1   | GSDMD  | TIGD5  | MAF1   | ZNF623  | ZNF707  | SCRIB   | DGAT1   | MAFA    | FAM83H  | NAPRT   | PLEC    | PUF60  | TSTA3   | ZC3H3   |         |         |         |         |         |       |       | 18    |    |
| ZBTB7A  | CYC1   | GPAA1  | MAPK15 | GSDMD  | GRINA  | TIGD5  | MAF1   | ZNF623  | DGAT1   | MAFA    | EPK1    | EEF1D   | FAM83H  | NRBP2   | PLEC    | PUF60  | ZC3H3   | PYCR3   |         |         |         |         |         |       |       | 18    |    |
| AR      | CYC1   | EXOSC4 | GPAA1  | SCX    | GSDMD  | WDR97  | SPATC1 | MAF1    | EEF1D   | MROH6   | NAPRT   | OPLAH   | PARP10  | SHARPIN | ZC3H3   | PYCR3  |         |         |         |         |         |         |         |       |       | 16    |    |
| ERG     | EXOSC4 | GPAA1  | HGH1   | HSF1   | MAF1   | ZNF623 | ZNF707 | BOP1    | SCRIB   | DGAT1   | EPK1    | FAM83H  | MROH6   | NAPRT   | PUF60   | TSTA3  |         |         |         |         |         |         |         |       |       | 16    |    |
| ETS1    | CYC1   | EXOSC4 | GPAA1  | GSDMD  | TIGD5  | MAF1   | ZNF623 | ZNF707  | SCRIB   | DGAT1   | EPK1    | FAM83H  | MROH6   | NAPRT   | PUF60   | TSTA3  |         |         |         |         |         |         |         |       |       | 16    |    |
| IRF1    | CYC1   | MAPK15 | GSDMD  | GRINA  | TIGD5  | MAF1   | DGAT1  | MAFA    | EPK1    | FAM83H  | MROH6   | NRBP2   | PLEC    | PUF60   | TSTA3   | PYCR3  |         |         |         |         |         |         |         |       |       | 16    |    |
| MYO01   | MAPK15 | GSDMD  | TIGD5  | WDR97  | MAF1   | DGAT1  | MAFA   | EEF1D   | CCDC166 | MROH6   | NAPRT   | NRBP2   | OPLAH   | SHARPIN | TSTA3   | PYCR3  |         |         |         |         |         |         |         |       |       | 16    |    |
| RCOR1   | EXOSC4 | GPAA1  | GSDMD  | GRINA  | SPATC1 | ZNF707 | SCRIB  | DGAT1   | MAFA    | EPK1    | FAM83H  | MROH6   | PARP10  | PLEC    | TSTA3   | PYCR3  |         |         |         |         |         |         |         |       |       | 16    |    |
| TCF12   | CYC1   | GPAA1  | MROH1  | GSDMD  | TIGD5  | WDR97  | MAF1   | DGAT1   | MAFA    | EPK1    | FAM83H  | NAPRT   | NRBP2   | SHARPIN | TSTA3   | PYCR3  |         |         |         |         |         |         |         |       |       | 16    |    |
| ELK1    | EXOSC4 | GPAA1  | HSF1   | GSDMD  | TIGD5  | MAF1   | ZNF623 | ZNF707  | BOP1    | SCRIB   | EPK1    | FAM83H  | PUF60   | TSTA3   | PYCR3   |        |         |         |         |         |         |         |         |       |       | 15    |    |
| FOXO1   | CYC1   | EXOSC4 | ZNF623 | FAM83H | CYC1   | EXOSC4 | GPAA1  | HSF1    | GRINA   | ZNF623  | ZNF707  | SCRIB   | DGAT1   | PUF60   | TSTA3   |        |         |         |         |         |         |         |         |       |       | 15    |    |
| KDM5B   | HSF1   | MAPK15 | GRINA  | WDR97  | SPATC1 | BOP1   | SCRIB  | DGAT1   | MAFA    | EEF1D   | CCDC166 | NAPRT   | NRBP2   | PLEC    | SHARPIN |        |         |         |         |         |         |         |         |       |       | 15    |    |
| KLf4    | HSF1   | MAPK15 | GRINA  | TIGD5  | MAF1   | BOP1   | SCRIB  | MAFA    | EEF1D   | FAM83H  | MROH6   | PLEC    | PUF60   | ZC3H3   | PYCR3   |        |         |         |         |         |         |         |         |       |       | 15    |    |
| TFAP2C  | MAPK15 | GRINA  | TIGD5  | SPATC1 | MAF1   | ZNF623 | ZNF707 | SCRIB   | DGAT1   | MAFA    | EEF1D   | MROH6   | NRBP2   | PARP10  | PLEC    |        |         |         |         |         |         |         |         |       |       | 15    |    |
| BCLAF1  | CYC1   | EXOSC4 | GPAA1  | GSDMD  | SPATC1 | MAF1   | ZNF623 | ZNF707  | SCRIB   | PARP10  | PLEC    | PUF60   | TSTA3   | ZC3H3   |         |        |         |         |         |         |         |         |         |       |       | 14    |    |
| E2F1    | CYC1   | GPAA1  | HSF1   | TIGD5  | MAF1   | ZNF623 | BOP1   | DGAT1   | MAFA    | EPK1    | FAM83H  | NAPRT   | NRBP2   | TSTA3   |         |        |         |         |         |         |         |         |         |       |       | 14    |    |
| MTA3    | EXOSC4 | GPAA1  | HSF1   | GSDMD  | SPATC1 | MAF1   | ZNF623 | ZNF707  | SCRIB   | DGAT1   | PARP10  | PUF60   | TSTA3   | PYCR3   |         |        |         |         |         |         |         |         |         |       |       | 14    |    |
| MAK     | CYC1   | EXOSC4 | GPAA1  | HSF1   | MAPK15 | GSDMD  | TIGD5  | BOP1    | SCRIB   | MAFA    | OPLAH   | PLEC    | MAFA    | OPLAH   | PLEC    |        |         |         |         |         |         |         |         |       |       | 13    |    |
| TPP     | GSDMD  | GRINA  | TIGD5  | SPATC1 | MAF1   | ZNF707 | MAFA   | EPK1    | FAM83H  | PARP10  | PUF60   | ZC3H3   | PYCR3   |         |         |        |         |         |         |         |         |         |         |       |       | 13    |    |
| ETV1    | EXOSC4 | GRINA  | ZNF623 | ZNF707 | MAFA   | EPK1   | NAPRT  | NRBP2   | OPLAH   | PUF60   | TSTA3   | ZC3H3   |         |         |         |        |         |         |         |         |         |         |         |       |       | 12    |    |
| KLf9    | CYC1   | MAPK15 | TIGD5  | SCRIB  | MAFA   | EPK1   | FAM83H | MROH6   | NRBP2   | PUF60   | TSTA3   | PYCR3   |         |         |         |        |         |         |         |         |         |         |         |       |       | 12    |    |
| MYBL2   | EXOSC4 | GPAA1  | HSF1   | GSDMD  | MAF1   | ZNF623 | ZNF707 | BOP1    | NAPRT   | PUF60   | TSTA3   | PYCR3   |         |         |         |        |         |         |         |         |         |         |         |       |       | 12    |    |
| STAT5A  | GPAA1  | GSDMD  | SPATC1 | MAF1   | ZNF623 | ZNF707 | SCRIB  | NAPRT   | PARP10  | PUF60   | TSTA3   | ZC3H3   |         |         |         |        |         |         |         |         |         |         |         |       |       | 12    |    |
| BCL6    | CYC1   | EXOSC4 | GSDMD  | TIGD5  | SPATC1 | ZNF623 | MAFA   | PARP10  | PLEC    | PUF60   | TSTA3   |         |         |         |         |        |         |         |         |         |         |         |         |       |       | 11    |    |
| CDK2    | CYC1   | GPAA1  | HSF1   | MAPK15 | WDR97  | MAF1   | SCRIB  | MROH6   | NAPRT   | SHARPIN | TSTA3   |         |         |         |         |        |         |         |         |         |         |         |         |       |       | 11    |    |
| TP53    | CYC1   | SPATC1 | MAF1   | ZNF623 | BOP1   | EPK1   | EEF1D  | FAM83H  | NRBP2   | PARP10  | TSTA3   |         |         |         |         |        |         |         |         |         |         |         |         |       |       | 11    |    |
| ARNT    | CYC1   | EXOSC4 | MAPK15 | GRINA  | MAF1   | SCRIB  | MAFA   | OPLAH   | PUF60   | ZC3H3   |         |         |         |         |         |        |         |         |         |         |         |         |         |       |       | 10    |    |
| ATF2    | EXOSC4 | SPATC1 | MAF1   | ZNF623 | SCRIB  | DGAT1  | PARP10 | PUF60   | TSTA3   | ZC3H3   |         |         |         |         |         |        |         |         |         |         |         |         |         |       |       | 10    |    |
| CREB1   | CYC1   | HSF1   | GRINA  | TIGD5  | MAF1   | BOP1   | DGAT1  | PUF60   | ZC3H3   | PYCR3   |         |         |         |         |         |        |         |         |         |         |         |         |         |       |       | 10    |    |
| ELK4    | EXOSC4 | GPAA1  | MAF1   | ZNF623 | ZNF707 | EPK1   | FAM83H | MROH6   | PUF60   | TSTA3   |         |         |         |         |         |        |         |         |         |         |         |         |         |       |       | 10    |    |
| FOXO2   | CYC1   | EXOSC4 | GSDMD  | MAF1   | FAM83H | NAPRT  | NRBP2  | PUF60   | TSTA3   | PYCR3   |         |         |         |         |         |        |         |         |         |         |         |         |         |       |       | 10    |    |
| GMEB2   | EXOSC4 | GPAA1  | HSF1   | TIGD5  | ZNF623 | BOP1   | SCRIB  | FAM83H  | PUF60   | TSTA3   |         |         |         |         |         |        |         |         |         |         |         |         |         |       |       | 10    |    |
| KDM5A   | EXOSC4 | GPAA1  | GRINA  | WDR97  | NAPRT  | PLEC   | PUF60  | SHARPIN | ZC3H3   | PYCR3   |         |         |         |         |         |        |         |         |         |         |         |         |         |       |       | 10    |    |
| NR2F1   | MAPK15 | GSDMD  | EXOSC4 | MROH1  | WDR97  | SPATC1 | MAF1   | CCDC166 | PARP10  | SHARPIN |         |         |         |         |         |        |         |         |         |         |         |         |         |       |       | 10    |    |
| NRF1    | GPAA1  | MROH1  | GRINA  | TIGD5  | MAF1   | BOP1   | DGAT1  | MAFA    | TSTA3   | ZC3H3   |         |         |         |         |         |        |         |         |         |         |         |         |         |       |       | 10    |    |
| SMAD4   | HGH1   | TIGD5  | MAF1   | DGAT1  | MAFA   | MROH6  | NAPRT  | PLEC    | PUF60   | ZC3H3   |         |         |         |         |         |        |         |         |         |         |         |         |         |       |       | 10    |    |
| SRF     | TIGD5  | WDR97  | DGAT1  | MAFA   | EEF1D  | PLEC   | PUF60  | SHARPIN | PYCR3   |         |         |         |         |         |         |        |         |         |         |         |         |         |         |       |       | 10    |    |
| STAT3   | GPAA1  | TIGD5  | SPATC1 | ZNF623 | ZNF707 | SCRIB  | DGAT1  | PARP10  | TSTA3   | ZC3H3   |         |         |         |         |         |        |         |         |         |         |         |         |         |       |       | 10    |    |
| ZEB1    | GPAA1  | GSDMD  | GRINA  | SPATC1 | ZNF707 | SCRIB  | FAM83H | NAPRT   | PARP10  | PLEC    |         |         |         |         |         |        |         |         |         |         |         |         |         |       |       | 10    |    |
| E2F6    | GPAA1  | HSF1   | TIGD5  | BOP1   | SCRIB  | MAFA   | EPK1   | PLEC    |         |         |         |         |         |         |         |        |         |         |         |         |         |         |         |       |       | 9     |    |
| SP4     | MAF1   | BOP1   | SCRIB  | DGAT1  | MAFA   | PUF60  | TSTA3  | PYCR3   |         |         |         |         |         |         |         |        |         |         |         |         |         |         |         |       |       | 9     |    |
| TCF4    | TIGD5  | SPATC1 | SCRIB  | MAFA   | EEF1D  | FAM83H | PARP10 | PUF60   | TSTA3   |         |         |         |         |         |         |        |         |         |         |         |         |         |         |       |       | 9     |    |
| BHLHE40 | HSF1   | GSDMD  | TIGD5  | BOP1   | DGAT1  | MAFA   | PLEC   | PUF60   |         |         |         |         |         |         |         |        |         |         |         |         |         |         |         |       |       | 8     |    |
| ESR1    | HSF1   | GSDMD  | MAF1   | BOP1   | SCRIB  | FAM83H | MROH6  | NAPRT   |         |         |         |         |         |         |         |        |         |         |         |         |         |         |         |       |       | 8     |    |
| FOS     | GPAA1  | MAPK15 | SPATC1 | MAF1   | ZNF623 | FAM83H | PARP10 | PYCR3   |         |         |         |         |         |         |         |        |         |         |         |         |         |         |         |       |       | 8     |    |
| CEBPB   | MAPK15 | SPATC1 | MAF1   | PARP10 | TSTA3  | ZC3H3  |        |         |         |         |         |         |         |         |         |        |         |         |         |         |         |         |         |       |       | 8     |    |

Total number of shared CanCord34 genes

**Supplementary Figure S20:** The transcription factor motifs present in the Cancord34 genes within 1kb up- and down-stream of TSS . The genes aligned in the positive and negative strands are shown as blue and red colors, respectively. The numbers of shared genes for TFs in a row are shown to the right. TFs are manually curated from ChIPBase v2.0 database.

TFs known to heterodimerize with base TFs

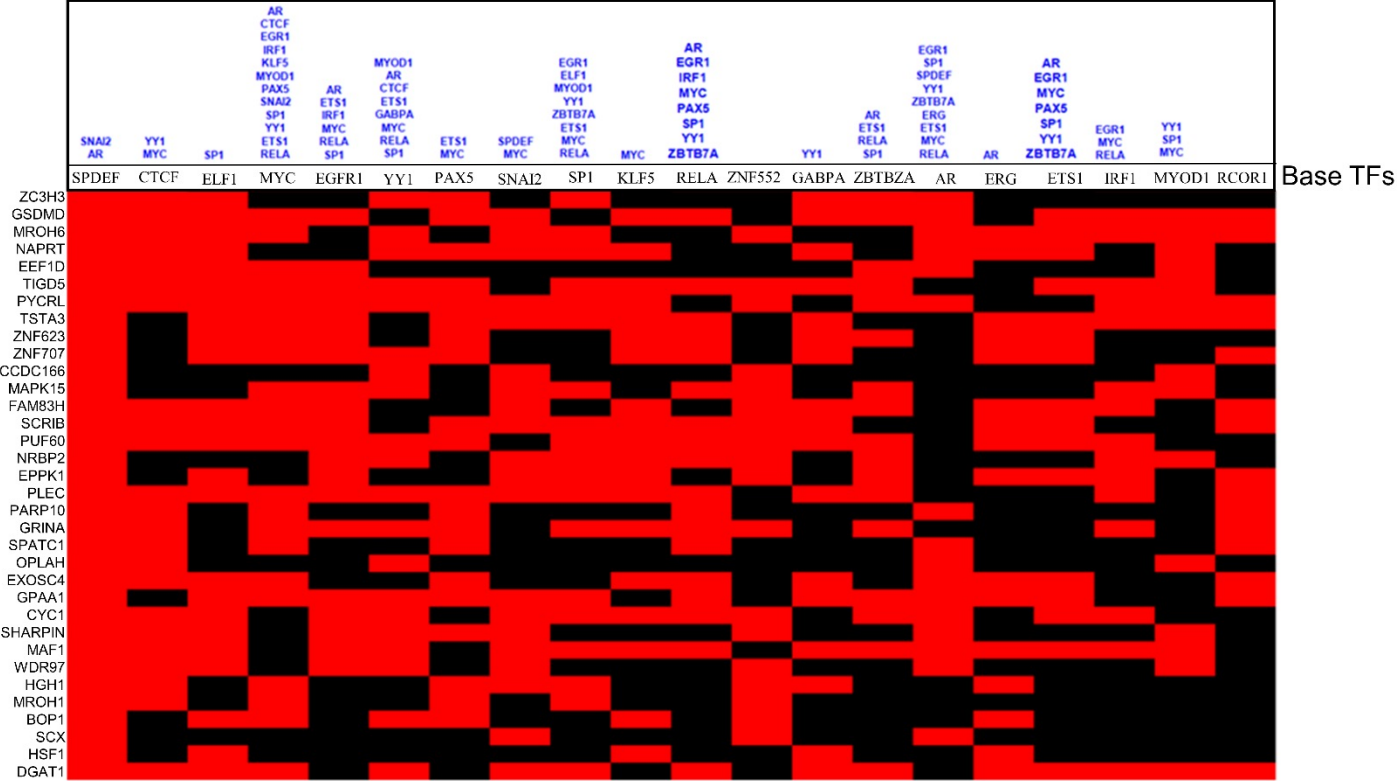

Supplementary Figure S21: Transcription factors binding motifs in CanCord34 genes and their heterodimerization with other TFs.



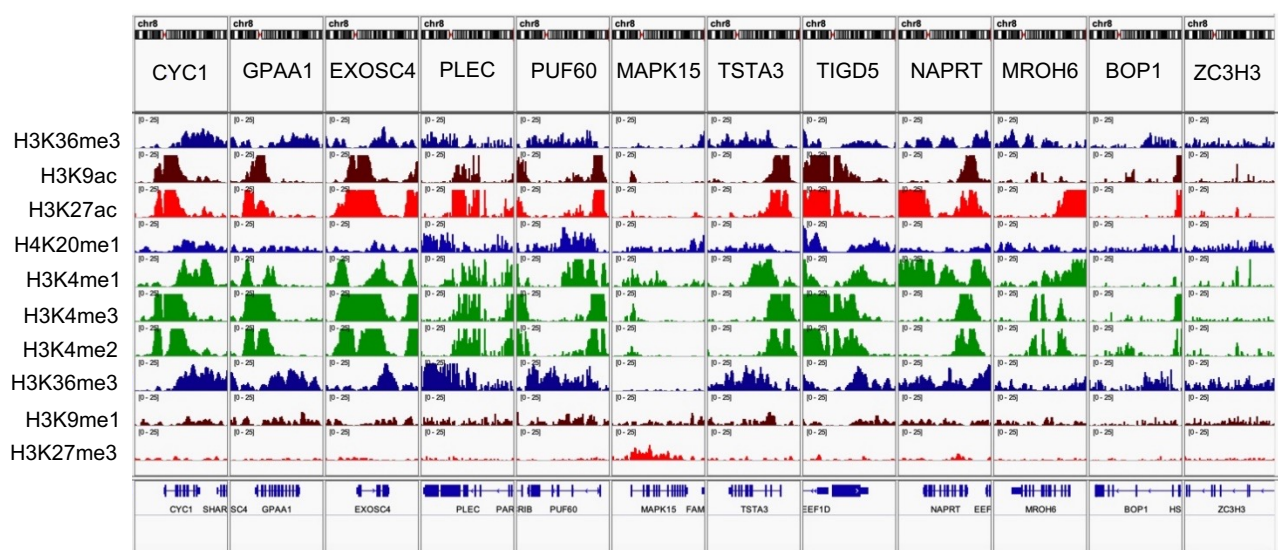

**Supplementary Figure S23.** Examples of shared TF's and histone marks across the genomic coordinates of a few members of CanCord34 genes using the UCSC genome browser.

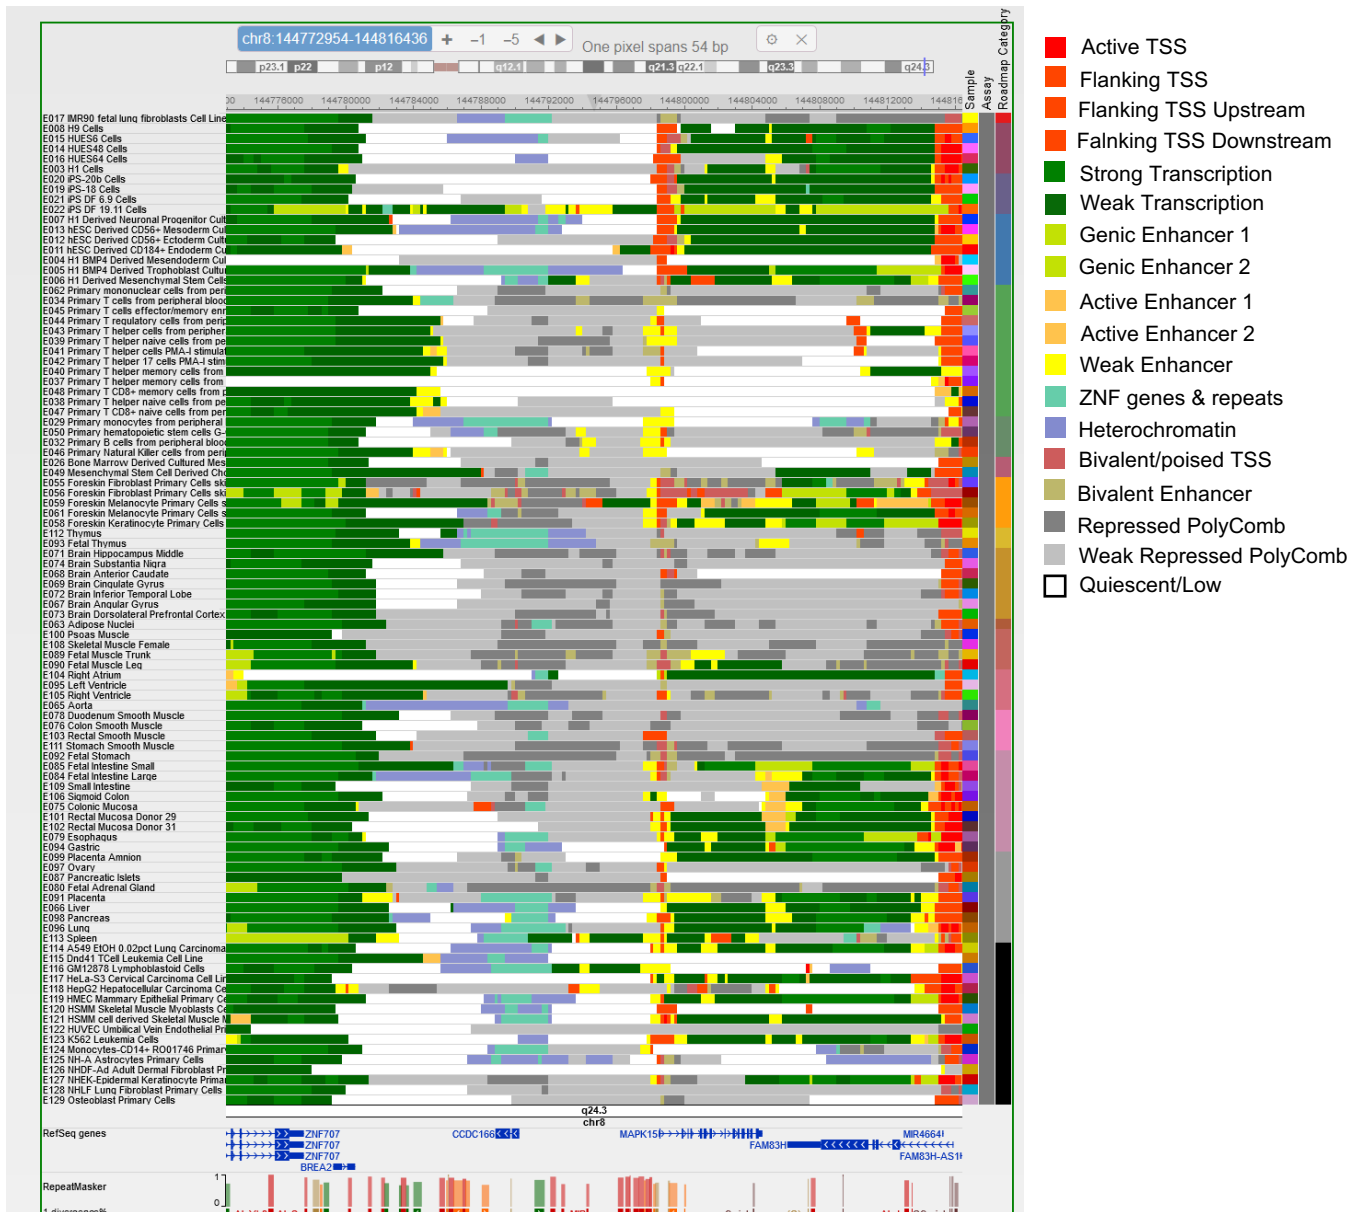

**Supplementary Figure S24:** The genomic coordinates of CanCord 34 genes. The genomic coordinates and possible regulatory elements were visualized using the UCSC genome browser in different cell lines. The regulatory elements are labelled with distinct codes.

**A.**

| GO biological process complete                   | Homo sapiens -<br>REFLIST<br>(20595) | upload_1<br>(34) | upload_1<br>(expected) | upload_1<br>(over/under<br>) | upload_1<br>(fold<br>Enrichment) | upload_1 (raw<br>P-value) | upload_1 (FDR) |
|--------------------------------------------------|--------------------------------------|------------------|------------------------|------------------------------|----------------------------------|---------------------------|----------------|
| immune response (GO:0006955)                     | 1678                                 | 3                | 2.77                   | +                            | 1.08                             | 7.54E-01                  | 1.00E+00       |
| immune system process (GO:0002376)               | 2370                                 | 4                | 3.91                   | +                            | 1.02                             | 1.00E+00                  | 1.00E+00       |
| regulation of immune system process (GO:0002682) | 1418                                 | 2                | 2.34                   | -                            | 0.85                             | 1.00E+00                  | 1.00E+00       |
| secretion (GO:0046903)                           | 486                                  | 1                | 0.8                    | +                            | 1.25                             | 5.56E-01                  | 1.00E+00       |
| secretion by cell (GO:0032940)                   | 366                                  | 1                | 0.6                    | +                            | 1.66                             | 4.57E-01                  | 1.00E+00       |
| neurotransmitter secretion (GO:0007269)          | 78                                   | 1                | 0.13                   | +                            | 7.77                             | 1.22E-01                  | 1.00E+00       |

**B.**

| GO molecular function complete                                   | Homo sapiens<br>- REFLIST<br>(20595) | upload_1<br>(34) | upload_1<br>(expected) | upload_1<br>(over/under) | upload_1 (fold<br>Enrichment) | upload_1<br>(raw P-value) | upload_1 (FDR) |
|------------------------------------------------------------------|--------------------------------------|------------------|------------------------|--------------------------|-------------------------------|---------------------------|----------------|
| DNA-binding transcription factor binding (GO:0140297)            | 402                                  | 3                | 0.66                   | +                        | 4.52                          | 2.87E-02                  | 1.00E+00       |
| cell adhesion molecule binding (GO:0050839)                      | 537                                  | 4                | 0.89                   | +                        | 4.51                          | 1.16E-02                  | 1.00E+00       |
| cadherin binding (GO:0045296)                                    | 323                                  | 4                | 0.53                   | +                        | 7.5                           | 1.98E-03                  | 1.00E+00       |
| cis-regulatory region sequence-specific DNA binding (GO:0003677) | 1223                                 | 5                | 2.02                   | +                        | 2.48                          | 4.91E-02                  | 1.00E+00       |
| DNA binding (GO:0003677)                                         | 2494                                 | 9                | 4.12                   | +                        | 2.19                          | 1.74E-02                  | 1.00E+00       |
| nucleic acid binding (GO:0003676)                                | 3989                                 | 14               | 6.59                   | +                        | 2.13                          | 3.51E-03                  | 1.00E+00       |
| heterocyclic compound binding (GO:1901363)                       | 5945                                 | 18               | 9.81                   | +                        | 1.83                          | 3.72E-03                  | 1.00E+00       |

**Supplementary Table S1:** Selected Biological process (A) and molecular function with p-values (B).
